## FUTURE LEADER REVIEW

# Actin cytoskeleton in angiogenesis

Nidhi Yadunandanan Nair, Victor Samuel, Lariza Ramesh, Areeba Marib, Deena T. David and Ananthalakshmy Sundararaman\*

## ABSTRACT

Actin, one of the most abundant intracellular proteins in mammalian cells, is a critical regulator of cell shape and polarity, migration, cell division, and transcriptional response. Angiogenesis, or the formation of new blood vessels in the body is a well-coordinated multi-step process. Endothelial cells lining the blood vessels acquire several new properties such as front–rear polarity, invasiveness, rapid proliferation and motility during angiogenesis. This is achieved by changes in the regulation of the actin cytoskeleton. Actin remodelling underlies the switch between the quiescent and angiogenic state of the endothelium. Actin forms endothelium-specific structures that support uniquely endothelial functions. Actin regulators at endothelial cell–cell junctions maintain the integrity of the blood–tissue barrier while permitting trans-endothelial leukocyte migration. This review focuses on endothelial actin structures and less-recognised actin-mediated endothelial functions. Readers are referred to other recent reviews for the well-recognised roles of actin in endothelial motility, barrier functions and leukocyte transmigration. Actin generates forces that are transmitted to the extracellular matrix resulting in vascular matrix remodelling. In this Future Leader Review, we attempt to synthesize our current understanding of the roles of actin in vascular morphogenesis. We speculate on the vascular bed specific differences in endothelial actin regulation and its role in the vast heterogeneity in endothelial morphology and function across the various tissues of our body.

**KEY WORDS:** Actin, Angiogenesis, Endothelium, RhoGTPase

## Introduction

Maintenance of a healthy vasculature is essential to nurture all tissues. Endothelial cells lining the blood vessels are not passive conduits for blood flow but actively participate in the maintenance of homeostasis in the sub-adjacent organs. Endothelial cells regulate the diffusion of oxygen, metabolites, nutrients and the passage of cells across the blood–tissue barrier. Formation of new blood vessels through vasculogenesis and further expansion of the network by angiogenesis happens through coordinated cell proliferation, migration, matrix attachment and remodelling, processes critically dependent on the actin cytoskeleton. Several recent reviews highlight the steps involved in angiogenic sprouting and the key molecular players involved in it (Eelen et al., 2020; Gurevich et al., 2021). Recent bulk and single cell RNA seq experiments reveal that indeed capillary endothelial cells exhibit enormous diversity between vascular beds

with gene signatures unique to the tissues they supply (Eelen et al., 2020; Gurevich et al., 2021; Paik et al., 2020). The two non-muscle actin isoforms ( $\beta$  actin and  $\gamma$  actin) form spatially segregated structures with differences in the  $\beta/\gamma$  ratio between different cell types (Dugina et al., 2021). However, there is strong evidence that total actin levels remain the same between arteries and veins. *In vitro* as well, culture conditions like cell density and shear stress do not affect total actin content per cell but can modulate the ratio between polymerised F actin and monomeric G actin (McGrath et al., 2000; Osborn et al., 2006). Differential regulation of actin might underly the diversity in shape and function of different capillary endothelial cells. Indeed, several actin binding proteins display heterogeneity between vascular beds. Enface microscopy of endothelial monolayers in different blood vessels reveal that F-actin in veins is primarily cortical while in adult arteries the F-actin fibres run between focal adhesions oriented in the same direction as the extracellular fibronectin fibres (van Geemen et al., 2014).

Actin governs a wide array of cellular functions. However, the underlying mechanism is simple; the polymerisation of monomers into filaments and its depolymerisation back to monomers. The molecular details of general actin regulation governing its polymerisation, bundling and severing is described in several reviews (Dominguez and Holmes, 2011, Lodish, 2016). Actin cytoskeleton in the endothelium is rapidly remodelled during endothelial polarity switching and migration during angiogenesis, while also conferring stability to cell junctions to maintain barrier function. In this Future Leader Review, we will look into actin-dependent structures and actin-driven function in endothelial cells. Broadly, actin can form contractile bundles, Arp2/3 dependent branched structures as seen in lamellipodia and linear filaments as observed in filopodia. Each of these have distinct functions in invasion, migration and sensing of guidance cues in the endothelial cells, as discussed below. We will focus on uniquely endothelial functions to decipher how actin plays a central role in these processes. Finally, we will briefly explore the upstream signalling cascades that alter the actin dynamics in endothelial cells.

## Actin monomer binding proteins in angiogenesis

Profilin is a critical ATP-actin binding protein that promotes actin polymerisation. Its regulation by phosphorylation allows endothelial cells to increase actin polymerisation in response to angiogenic signalling through VEGFR2 at the leading edge of migrating cells (Fan et al., 2012). VEGF-VEGFR2 signalling is the best-studied signalling axis in angiogenesis and VEGFR2 mediated signals cause actin polarisation and cell elongation during angiogenesis (Cao et al., 2017). VEGFR2 signalling activates Src to directly phosphorylate Profilin 1 at Tyr129 in an endothelial cell-specific manner. This phosphorylation, while dispensable for developmental angiogenesis, is critical for post-ischaemic angiogenesis as shown with conditional endothelial knock-in of phospho-deficient Pfn1(Y129F) mouse model (Fan et al., 2012). Global profilin knockout (KO) embryos die at the two-cell stage (Witke et al., 2001), while, in contrast, global KO of thymosin  $\beta_4$ , another G-actin binding abundant protein,

Cardiovascular Diseases and Diabetes Biology, Rajiv Gandhi Centre for Biotechnology, Thiruvananthapuram, Kerala, India 695014.

\*Author for correspondence (ananthalakshmys@rgcb.res.in)

 A.S., 0000-0002-5661-4656

This is an Open Access article distributed under the terms of the Creative Commons Attribution License (<https://creativecommons.org/licenses/by/4.0>), which permits unrestricted use, distribution and reproduction in any medium provided that the original work is properly attributed.

results in viable mice born in mendelian ratios (Banerjee et al., 2012). However, this result is refuted by another study in the same year, again with mice models, suggesting that global thymosin  $\beta 4$  (T $\beta 4$ )-null embryos develop haemorrhage due to reduction in smooth muscle coverage of developing vessels. This study suggests significant embryonic lethality with incomplete penetrance in T $\beta 4$ -null mice (Rossdeutsch et al., 2012). The study further demonstrates that the haemorrhagic phenotype persists when endothelial-specific T $\beta 4$ -knockdown is performed *in vivo*. Endothelium secreted T $\beta 4$  might facilitate mural coverage of vessels. Since both papers use C56/Bl6 mice and target exon2, the difference in phenotype reported for thymosin  $\beta 4$  deficiency is not currently explained. A role for thymosin  $\beta 4$  in developmental angiogenesis is supported by the recent spatially resolved single cell RNA seq and validation experiments on chicken hearts suggesting that thymosin  $\beta 4$  is persistently enriched during coronary vessel development (Mantri et al., 2021). Clearly, profilin seems to play a major role in cellular actin regulation compared to thymosin  $\beta 4$  as the former shows a strong, completely penetrant lethal phenotype, while the latter shows incompletely penetrant phenotypes due to possible compensation by other G-actin-binding proteins.

The balancing act that maintains the equilibrium between F and G actin in cells is also through the autoregulation of actin mRNA by the monomeric G actin (Lyubimova et al., 1997). Thus, minor changes to this equilibrium contribute to cell morphological, transcriptional, and functional outputs. For example, the CTIP2 transcription factor (also known as BCL11B) is highly expressed in vascular smooth muscle cells. It mediates the phosphorylation on the actin polymerase VASP at Ser 239, inhibiting its activity. The inhibition results in a decrease in the F/G-actin ratio that modulates vascular stiffness. Indeed, a loss of CTIP2 results in the loss of the inhibitory phosphorylation on VASP, causing increased polymerisation of actin and increased aortic stiffness. The increased vascular stiffness translates to increased cerebral microbleeds in CTIP2-null mice (Valisno et al., 2021). The monomeric G actin can by itself regulate endothelial function. G actin can directly bind to the 3'UTR of endothelial nitric oxide synthetase (eNOS) mRNA (Searles et al., 2004) and can also directly interact with eNOS protein (Kondrikov et al., 2010), thereby regulating NO release and vascular tone (Fels et al., 2012). Actin also directly binds to a 27 nucleotide repeat region on the eNOS promoter regulating its expression (Ou et al., 2005). Thus, actin closely controls vascular tone by regulating the gene expression, mRNA stability and protein function of eNOS.

Actin monomers play a key role in the nuclear localisation of proteins, chromatin methylation, and transcriptional regulation (Bajusz et al., 2018). Nuclear actin also has a significant role in vascular morphogenesis. Nuclear actin is essential for the regulation of transcription. Changes in actin dynamics directly affect gene expression (Miralles and Visa, 2006). Formin-dependent actin dynamics play a crucial role in DNA replication by regulating nuclear transport and loading of replication complex proteins onto chromatin (Parisís et al., 2017). STK35L1, a nuclear Ser/Thr kinase, interacts with nuclear actin to regulate both the cell cycle and migration of endothelial cells (Goyal et al., 2011). Thus, actin itself, as well as monomeric actin binding proteins (see Table 1), plays a crucial role in maintaining an F-actin to G-actin ratio conducive to endothelial function.

#### Regulators of actin polymerisation in endothelial function

An essential first step in actin polymerisation is the nucleation of a new filament. Several actin nucleators are involved in this process.

These include the Arp2/3 complex with its nucleation promoting factors (NPFs), the Formin family of proteins, and tandem actin monomer-binding proteins of nucleation. Actin nucleators play several crucial roles in endothelial biology. Arp2/3 drives junctional lamellipodia formation. Inhibition of the Arp2/3 complex in endothelial cells can interfere with VE-cadherin dynamics at cell-cell junctions compromising endothelial barrier functions (Abu Taha et al., 2014). Endothelial-cell-specific postnatal Arpc4 (subunit of Arp2/3 complex) deletion results in a reduction in lamellipodial protrusions and the ability of endothelial cells to migrate into avascular areas during retinal angiogenesis, leading to severe compaction of the vascular front (Figueiredo et al., 2021 preprint). There was a striking increase in the number and length of filopodia in the endothelial cells of Arpc4-KO (inducible endothelial-cell specific KO) mice (Figueiredo et al., 2021 preprint), possibly caused by a processive lengthening of actin filaments in the absence of branching. N-WASP and WAVE proteins are the major nucleation promoting factors that regulate the Arp2/3 complex. Angiogenic signalling regulates the localisation and activity of the nucleation promoting factors. For example, in response to VEGF, there is a relocalisation of N-WASP to the cell surface through its interaction with the SH2-SH3 containing adaptor protein, Nck, which directly binds to the VEGFR2 receptor. Therefore, VEGF signalling activates nucleation of actin fibres aiding in endothelial motility (Gong et al., 2004).

Cortactin, another NPF protein, drives Arp2/3 dependent actin assembly by preventing its dissociation from the parent filament so that branch points are stabilised. Cortactin drives nucleation of actin at the leading edge of endothelial cells. As the name suggests, the protein is mainly involved in cortical actin remodelling. Like the WASP family of NPFs, cortactin is also regulated downstream of angiogenic signalling. For example, VEGF drives cortactin phosphorylation through Src kinase at the tyrosine 421 that in turn leads to its enrichment in membrane protrusions (Spring et al., 2012). Cortactin is important for endothelial migration and capillary formation in response to sphingosine-1-phosphate (Li et al., 2004).

While the nucleation promoting factors, along with Arp2/3 promote the polymerisation of actin, capping proteins generally bind to the fast-growing barbed end of actin and block the addition and loss of actin monomers. We previously discussed the relocalisation of NPFs in response to angiogenic VEGF signalling to cause actin polymerisation at specific areas. As capping proteins prevent actin polymerisation by binding to barbed end, we expect angiogenic signals to inhibit capping protein binding, to promote actin polymerisation at leading edges. For example, Hsp27, which acts as an actin capping protein, is indeed sensitive to VEGF. Phosphorylation of Hsp27 leads to an inhibition of the actin filament capping and only the non-phosphorylated monomers of Hsp27 can cap actin filaments (Landry and Huot, 1999). In response to VEGF signalling, the SAPK2 kinase phosphorylates and therefore inhibits Hsp27 dependent capping, promoting actin reorganisation (Landry and Huot, 1999). Similarly, MK2-dependent phosphorylation of Hsp27 promotes actin remodelling downstream of TNF $\alpha$  signalling (Chang et al., 2011).

Similarly, actin filament capping by tropomodulin (Tmod3) causes a reduction in cell motility in endothelial cells, presumably by preventing lamellipodial protrusions that require actin branching. Interestingly, Tmod3 is unique in being able to cap the pointed end of actin fibres. Tmod3 dependent pointed end capping significantly reduces F-actin in the lamellipodia while G actin remained unaltered. Also, the pointed end capping by overexpressed Tmod3 reduces the number of free barbed ends available in the cell.

**Table 1 . Actin binding proteins and their role in angiogenesis.**

| S. No | Actin binding protein                  | Actin regulation in angiogenesis                                                                                                                            | Control of actin dynamics                                               | References                                     |
|-------|----------------------------------------|-------------------------------------------------------------------------------------------------------------------------------------------------------------|-------------------------------------------------------------------------|------------------------------------------------|
| 1     | Profilin 1 and Profilin 2              | Profilin 1 is phosphorylated downstream of VEGF signalling in Tyr 129. Profilin 2 promotes endothelial cell proliferation and migration                     | Actin Polymerisation at the plus end, affinity for ATP actin            | Li et al., 2022; Fan et al., 2012              |
| 2     | Thymosin $\beta$ 4                     | Promotes migration                                                                                                                                          | Capping, sequesters G actin to make it polymerisation incompetent       | Gladka et al., 2021; Cha et al., 2003          |
| 3     | FMNL3                                  | Promotes the extension of endothelial filopodia formation to facilitate angiogenic sprouting                                                                | Nucleation, Polymerisation and filopodia formation                      | Wakayama et al., 2015; Zeng et al., 2018       |
| 4     | Afadin                                 | Knockdown of afadin reduced VEGF induced network formation                                                                                                  | Linking adherence junction and tight junction to actin filament         | Tagashira et al., 2018; Birukova et al., 2012  |
| 5     | Vinculin                               | Overexpression of Vinculin inhibited tube formation and migration in HUVECs                                                                                 | Connection between VE-cadherin and F actin                              | You et al., 2021; Huvneers et al., 2012        |
| 6     | FHOD1                                  | Ang2-induced RhoA activation. Mediates lymphatic endothelial cell migration and lymphangiogenesis                                                           | Nucleation and actin polymerisation                                     | Akwii et al., 2022; Takeya et al., 2008        |
| 7     | IQGAP1                                 | Knockdown of IQGAP1 in Choroid endothelial cell significantly reduced VEGF-induced Rac1GTP, required for cell migration                                     | Formation of ventral lamellipodia                                       | Wang et al., 2020; Martinelli et al., 2013     |
| 8     | Nonmuscle Myosin II                    | Inhibits excessive branching in angiogenic sprouts                                                                                                          | Actin contractions                                                      | Ma et al., 2020                                |
| 9     | $\alpha$ Parvin                        | Depletion impairs vessel stability                                                                                                                          | Connects F-actin to Focal adhesions                                     | Fraccaroli et al., 2015                        |
| 10    | Myc Target 1 (Myct1)                   | Promotes endothelial motility by interacting with ZO1, CKAP4 and regulating RhoGTPases                                                                      | Transcriptional regulation of RhoA and ZO1 to regulate junctional actin | Kabir et al., 2021                             |
| 11    | Ena/VASP                               | Internalisation and phosphorylation of VEGFR2 via the MAPK/ERK pathway; filopodia and lamellipodia formation                                                | Anti- capping, promote polymerisation                                   | Zink et al., 2021; Barzik et al., 2005         |
| 12    | Filamin A                              | Tube formation and cell migration downstream of VEGF signalling                                                                                             | Crosslinking actin filaments                                            | Li et al., 2020; Griffiths et al., 2011        |
| 13    | Cofilin                                | Pak1 dependent cofilin phosphorylation inhibit VEGF-induced angiogenesis                                                                                    | Severing                                                                | Kumar et al., 2016; Slee and Lowe-Krentz, 2013 |
| 14    | $\alpha$ II Spectrin                   | Knockdown of $\alpha$ II-spectrin disturbs the stability of cell-to-cell contacts resulting in decreased level of VE-cadherin, MCAM and $\beta$ 3-integrins | Associate with VASP to form perijunctional actin filament assembly      | Machnicka et al., 2020; Benz et al., 2008      |
| 15    | $\beta$ 4 Spectrin                     | Regulate stalk-cell-specific VEGFR2 activity essential for proper tip-stalk cell specification during sprouting                                             | Actin crosslinking                                                      | Kwak et al., 2022                              |
| 16    | Phosphatase actin regulator 1(PHACTR1) | Tubulogenesis through NRP-1 and VEGFR1 Lamellipodia dynamics                                                                                                | Binds G actin through RPEL motif                                        | Allain et al., 2012; Mouilleron et al., 2012   |
| 17    | EPLIN                                  | ERK phosphorylation of EPLIN result in reduce tubule formation                                                                                              | Connects adherent junction to actin                                     | Sanders et al., 2010, Liang et al., 2017       |
| 18    | EZRIN                                  | Regulate cell migration and tube formation via Hippo-YAP pathway                                                                                            | Stress fibre formation                                                  | Chen et al., 2021; Adyshev et al., 2011        |
| 19    | $\alpha$ actinin 4                     | Endothelial cell stiffness, regulation of neutrophil transmigration; increased around atherosclerotic plaques                                               | Actin crosslinking                                                      | Schaefer et al., 2014                          |
| 20    | Marcks1                                | Lumen expansion                                                                                                                                             | Linear actin bundles; thinning cortical actin                           | Kondrychyn et al., 2020                        |
| 21    | mABP1                                  | Trans-endothelial migration of leukocytes                                                                                                                   | Actin reorganisation in lamellipodia                                    | Hepper et al., 2012                            |

Capping at the pointed end by Tmod3 is then expected to give rise to longer-lived filaments due to the slow rate of depolymerisation. These longer-lived filaments with more ADP-Actin might not support Arp2/3-dependent branching as Arp2/3 nucleates from ATP actin subunits. Decreased branching will reduce the number of barbed ends available and thus explains the reduction in F-actin at the lamellipodia (Fischer et al., 2003).

Formins are another class of proteins that control the nucleation and polymerisation of new actin filaments. Formins contain the FH1 domain with polyproline tracks that bind to profilins for the processive elongation of actin filaments (Paul and Pollard, 2008). Most formins also contain a GTPase-binding domain (GBD). RhoGTPases activate formins by disrupting an intramolecular

inhibitory interaction (Watanabe et al., 1997). As proteins aiding in processive filament elongation, formins are involved in filopodia formation, assembly of stress fibres, actin networks for vesicular transport, cell adhesion, and stabilisation of endothelial junctions (Schonichen and Geyer, 2010).

While the physical binding of the active RhoGTPase to the GBD disrupts the inhibitory interaction between FH3 and DAD domains in formins, phosphorylation events can also regulate the inhibitory state of formins. For example, the phosphorylation of the formin FHOD1 by RhoA/ROCK releases FHOD1 from its autoinhibited state and induces stress fibre formation (Takeya et al., 2008). Differential RhoGTPase activation downstream of angiogenic signals would correspondingly activate formins to nucleate and

form long actin filaments. For example, mDia activation by RhoA downstream of Angiopoietin1 signalling promotes endothelial junctional stability (Gavard et al., 2008).

Filopodial protrusions in the direction of the pro-angiogenic signal helps in efficient endothelial cell migration during angiogenesis (Mellor, 2010). In an siRNA screen for formins playing a role in angiogenesis using an *in vitro* co-culture assay model, FMNL3, DAAM2, and FHOD1 were found to be critical regulators (Yamada and Nelson, 2007). FMNL3 is a regulator of endothelial cell elongation during angiogenesis. Overexpressing FMNL3 in endothelial cells causes an intense reorganisation of actin. FMNL3 acts downstream of RhoJ to mediate the polarised trafficking of podocalyxin to the endothelial AMIS, initiating vascular lumen formation (Richards et al., 2015). FMNL3 also helps in maintaining a pool of dynamic F-actin filaments at endothelial cell junctions that reinforces junction stability, thereby aiding lumenogenesis (Phng et al., 2015). Regulators of filopodial extensions is dealt with in detail in subsequent sections. Key regulators of actin nucleation and polymerisation are summarised in table 1

## Endothelial actin structures

### Junction associated lamellipodia

JAILs are small (1-5  $\mu\text{m}$ ) actin-driven protrusions that form at adherens junctions. They regulate VE-cadherin dynamics at cell-cell junctions (Cao and Schnittler, 2019; Cao et al., 2017). JAILs are formed in response to VEGF signalling induced cell elongation that leads to localised reduction in VE-cadherin concentrations. This triggers Arp2/3 and Rac dependent actin polymerisation leading to junctional small JAILs. JAILs have been demonstrated *in vivo* in developing mouse retinal vessels at the tip-cell-stalk-cell interface (Cao et al., 2017). Indeed, localised MLCII dephosphorylation downstream of VEGFR2 signalling can reduce membrane tension locally to permit JAIL formation (Cao et al., 2017). In endothelial cell migration, junctional oscillations play a crucial role and these junctional protrusions have been confirmed *in vivo* in zebrafish (Paatero et al., 2018). They are variously called junction associated intermittent lamellipodia (JAILs) or junction based lamellipodia (JBL). JAILs causing overlap between adjacent endothelial cells was initially described in (Abu Taha et al., 2014). The interactions in trans create new VE-cadherin contact sites. JAILs play a crucial role in endothelial cell-cell communications (Cao and Schnittler, 2019). The relevance of JAIL in regulating junctional permeability is evident in the transient inhibition of JAIL formation in response to thrombin which increases endothelial permeability (Cao and Schnittler, 2019).

JBL forms when two tip cells come together during anastomosis and lumen formation. The role of JBL was explored during angiogenesis in zebrafish, where these structures promoted junctional elongation and cell-cell rearrangements (Paatero et al., 2018). When two tip cells come together for anastomosing, the F-actin protrudes from a stable distal junction. VE-cadherin then diffuses onto the distal end, establishing inter-endothelial contacts. The new contacts serve as a clutch, and the F-actin remodelling provides the motive force that pulls the proximal junction towards the newly formed distal junction. Hence, the endothelial cells move onto one other via VE-cadherins (Paatero et al., 2018).

While JAILs and JBLs are recently described junctional actin structures, several follow-up studies describe key molecular players in this process. Signalling through the YAP/TAZ pathway causes increased VE-cadherin turnover and JAIL formation. JAIL helps endothelial cells maintain the barrier function while undergoing cell rearrangements during angiogenesis (Neto et al., 2018).

Stretch-induced mechanical signals are integrated with BMP signalling by the YAP/TAZ pathway to regulate JAILs. Interestingly, loss of this pathway causes an increase in F-actin bundles and a loss of branched actin networks that characterise the JAIL structure. Thus, a lack of YAP/TAZ leads to straighter junctions with less VE-cadherin turnover (Neto et al., 2018).

Actin binding proteins like coronin 1B (Werner et al., 2020),  $\alpha$ -Parvin (Fraccaroli et al., 2015), and EPLIN  $\alpha$  and  $\beta$  (Taha et al., 2019) are critical regulators of JAIL formation (Seebach et al., 2020). In summary, JAILs and JBL are under the control of mechanical cues like shear stress or stretch. They depend on branched actin formation under the control of Arp2/3, much like the classical lamellipodia, and are driven by Rac1, WASP, and WAVE family proteins. Junctional actin structures are critical regulators of VE-cadherin-mediated endothelial barrier properties.

Membrane blebbing in endothelial cells is also actin dependent. While there are very few studies of membrane blebbing on endothelial cells, it has been described in response to toxic stimuli like peroxide and ouabain (Özdemir et al., 2015; van Gorp et al., 1999). It is primarily driven by RhoA-ROCK mediated cortical actin contraction. Blebbing in endothelial cells can be induced by diabetic retinopathy and in this context, in human samples, ROCK was demonstrated in endoluminal blebs (Rothschild et al., 2017). While membrane blebbing is associated with cell death, it could also play a physiological role in cell spreading and precedes the appearance of lamellae and delays its appearance in spreading endothelial cells (Norman et al., 2011). Blebs differ from JAILs in their involvement of cortical actin and the ROCK pathway instead of Rac1 and junctional actin. Crucially both blebbing and JAILs dependent on a reduction in junctional VE-cadherin density (Corada et al., 1999).

### Apical Membrane Insertion Site (AIMS)

F-actin localises in the form of a bleb or a bud on the apical side of the cell from which long actin cables radiate, carrying prospective cargo to the early apical surface (Richards et al., 2015). This structure is designated as the AMIS in endothelial cells (Richards et al., 2015). Linear actin cables are nucleated from the AMIS. FMNL3 increases the size of the AMIS, suggesting that it is the actin nucleator at AMIS. FMNL3 coordinates the delivery and incorporation of podocalyxin via F-actin cables into the apical surface leading to the formation of a mature lumen (Richards et al., 2015). AMIS is rich in Ezrin/Rodixin/Moesin (ERM)-family proteins, which physically interact with podocalyxin and actin proteins and help in lumenogenesis. Cell polarity is established through coordinated regulation of both the actin and microtubule cytoskeleton. FMNL3 also regulates endothelial cell microtubules during angiogenesis (Hetheridge et al., 2012). FMNL3 interacts with RhoGTPases Cdc42 and RhoJ, and they act as upstream activators of FMNL3.

VE-cadherin and Moesin are also involved in establishing a polarised apical membrane surface. Moesin positions the F-actin-rich bud correctly at the apical surface (Galvagni et al., 2012). *In vivo* studies also show that F-actin localises to the juxtaposed early apical surface between endothelial cells and VE-cadherin is a pre-requisite for Moesin and F-actin recruitment. Finally, F-actin-Myosin-II-mediated contractility opens up and stabilises the nascent extracellular lumen. Interestingly, here podocalyxin and ERM proteins like Moesin are reported to be essential for F-actin recruitment to the apical membrane (Strlič et al., 2009). The exact order of protein recruitment to the early apical surface that facilitates lumenogenesis remains controversial.

## Kugeln

'Kugeln' is a German term that translates to 'sphere'. It refers to round protrusions formed on the endothelial membrane in transgenic zebrafish with an actin-rich neck region. They are nitric oxide containing structures that are found exclusively on cerebral vessels in zebrafish (Kugler et al., 2019). They do not communicate with the vessel lumen, form in the absence of flow, and contain little to no cytoplasm. These structures are actin and Notch-dependent, and their formation is inhibited by VEGF and Wnt signalling (Kugler et al., 2019). Their functional significance remains a mystery.

## Podosomes

Podosomes refer to specialised cell-matrix contact sites capable of extracellular matrix degradation. They are characterised by the presence of F actin, cortactin, and metalloproteinases. Cultured endothelial cells often form 5–10- $\mu$ m-wide, ring-like clusters of podosomes called rosettes. The podosome-mediated degradation of the vascular basement membrane is critical for sprouting angiogenesis (Seano et al., 2014b). These structures have an actin core formed by actin nucleators (Arp2/3), actin binders (tropomyosin), polymerisation activators (WASP), and GTPases (RhoA, Cdc42, dynamin) as well as a ring formed by adhesion molecules like vinculin (Gimona et al., 2008; Moreau et al., 2003).

Podosome formation in endothelial cells occurs through the initial mobilisation of the scaffolding protein Tks5 and F-actin accumulation. Subsequently, Septin 2 gets recruited, which regulates podosome maturation (Collins et al., 2020). Septin 6, septin 7, and septin 9 are localised to Src-induced podosome formation (Collins et al., 2020). GIT1 is an important mediator of VEGF-induced podosome formation in endothelial cells (Wang et al., 2009). VEGF-dependent upregulation of  $\alpha$ 6 $\beta$ 1 and its subsequent translocation into podosomes is critical for degradation of the matrix and formation of branch points on the vessel during angiogenesis (Seano et al., 2014a). *Ex vivo* cultured aortic vessel segments show endothelial podosome rosette formation in response to TGF  $\beta$  (Varon et al., 2006). Podosomes degrade the underlying basement membrane proteins like collagen IV, thereby playing a role in arterial vascular remodelling (Rottiers et al., 2009). Tip cells assemble podosomes during physiological angiogenesis *in vivo* (Spuul et al., 2016). While VEGFA promotes the formation of podosome rosettes with high matrix degradation potential, the Notch ligand Dll4 negatively regulates podosomes (Spuul et al., 2016). ARHGAP35 (p190A RhoGAP) negatively regulates the number of podosome structures in endothelial cells, while the closely related p190B RhoGAP (ARHGAP5) promotes the localisation of MT1-MMP and MMP2 in podosome structures regulating their ability to degrade the ECM locally without altering podosome numbers (Guegan et al., 2008). Interestingly, both p190ARHGAPs act on RhoA primarily (Muller et al., 2020), suggesting that their isoform-specific function in endothelial cells is perhaps independent of their action on RhoA. Protein kinase A (PKA) is yet another negative regulator of podosome rosettes in endothelial cells through the inhibition of Cdc42 activity by increasing Cdc42 interaction with RhoGDI $\alpha$  (MacKeil et al., 2019). Taken together, the formation and maturation of podosomes are tightly regulated by actin remodelling proteins and their upstream angiogenic signals to ensure stepwise progression of new vessel formation.

## Filopodia

Filopodia have long parallel actin filaments arranged in a tight bundle. They are finger-like projections with the fast-growing barbed ends of actin filaments orientated towards the plasma membrane (Mallavarapu and Mitchison, 1999). Filopodia are

classically thought of as mediating directional cell migration in response to extracellular cues. In the context of angiogenesis, they serve to sense the gradients of growth factors like VEGF-A, particularly in tip cells as indicated in mice retinal angiogenesis models (Gerhardt et al., 2003). However, later studies from the Gerhardt group using zebrafish models expressing Life-act EGFP in endothelial cells demonstrated that an inhibition of filopodial protrusion with low doses of Latrunculin B does not inhibit directional migration of intersegmental vessel endothelial cells. Lamellipodia provide sufficient driving force for migration and the directionality is fully compensated for by the lamellipodial protrusions in the developmental angiogenesis of intersegmental vessels (later study from Gerhardt group). Interestingly, tip-cell specification and ectopic branching in the absence of Notch ligand Dll4 were not dependent on filopodia but vessel anastomosis did depend on endothelial cell filopodia (Phng et al., 2013).

More recently, it was demonstrated that specialised broader membrane ruffles arising from filopodia called dactylopodia are used by tip cells for invasion into the extracellular matrix. The balance between Arp2/3 and Myosin IIA (NMIIA) activity determines the number of filopodial and dactylopodial protrusions (Figueiredo et al., 2021). While these structures are functionally similar to podosomes in their ability to promote cell invasion, dactylopodia are formed through a conversion of pre-existing filopodia through Arp2/3-dependent branching while Arp2/3-deficient endothelium ends up forming excessive filopodia without dactylopodial maturation. Indeed, the role of NMIIA in keeping Arp2/3 activity in check to promote filopodial stability *in vivo* suggests that the regulation of dactylopodia is different from that of podosomes. Podosomes can form rosettes in sprouting vessels *in vivo* and the process is negatively regulated by Notch signalling. Indeed, inhibition of Notch can lead to podosomes in stable ensheathed vessels of the retina as well (Spuul et al., 2016), while dactylopodia seem to be highly tip-cell specific.

During endothelial sprouting, the tip cells extend multiple filopodia, which are enriched in VEGF receptors, particularly VEGFR2/3 heterodimers (Nilsson et al., 2010), which enable the cells to sense gradients of VEGFA and VEGFC. Cdc42 is the key RhoGTPase linked to filopodia formation. For example, BMP signalling, through the Cdc42-FMNL3 axis, regulates filopodia formation in endothelial cells (Wakayama et al., 2015). Bradykinin, an inflammatory mediator, induces the formation of filopodia via the Cdc42 pathway (Petrovic et al., 2007). FGD5 is an EC-specific RhoGEF that binds and activates Cdc42 (Cheng et al., 2012). Not surprisingly, FGD5 is also a key regulator of endothelial filopodial number and length (Farhan et al., 2017). FGD5 promotes vascular pruning in mouse retinal model of angiogenesis (Cheng et al., 2012). YAP/TAZ transcription factors regulate actin remodelling at filopodia and cell-cell junctions. Endothelial-specific deletion of YAP/TAZ leads to fewer filopodia and disarranged tight as well as adherens junctions (Kim et al., 2017). Lats1/3 inducible deletion in endothelial cells is a tool used by these authors to hyperactivate the YAP/TAZ pathway. This showed several phenotypes like hypernumeric filopodial extensions from the tip cells and hyperproliferation of endothelial cells. Loss of YAP/TAZ reduces VEGF-induced Cdc42 activity but not RhoA and Rac1. The loss of Cdc42 activity was traced to a reduction in total protein levels of Cdc42. This leads to a loss of MLC2 activity that possibly controls junctional integrity and filopodial protrusions in endothelial cells (Kim et al., 2017). Alongside Cdc42, several actin cytoskeletal regulators are downregulated in YAP/TAZ deficient brain endothelial cells compared to WT,

demonstrating a multi-faceted regulation of the actin cytoskeleton by the YAP/TAZ pathway.

RhoA is also implicated in filopodia formation downstream of angiogenic signals. Syx, a RhoA GTPase exchange factor (GEF), serves as an important protein that binds with angiominin (Amot) and regulates the activity of RhoA (Ernkqvist et al., 2009). Filopodia contact the ECM to initiate the focal contact points through focal adhesion kinase (FAK) (Mitra et al., 2005). Filopodia are hence the first contact between the ECM and migrating cells and help in cell spreading through small Rho GTPases. The Slit-Robo pathway promotes filopodia formation in endothelial cells through the direct interaction of Robo4 with actin nucleators: WASP, N-WASP, WIP, and Mena (Sheldon et al., 2009). Endothelial actin structures are depicted in figure 1 along with the key actin regulators and signalling pathways that regulate them.

**Mechano-responsive actin regulators in endothelial cells**

The YAP/TAZ pathway is indeed one of the key mechano-sensitive pathways with multifaceted roles in actin remodelling. Hemodynamic shear stress-mediated lumen stabilisation is dependent on actin cytoskeletal remodelling. Shear stress causes a thickening of cortical actin bundles in endothelial cells that recruit the AMOT protein. The AMOT-family proteins are negative regulators of the YAP/TAZ signalling (Zhao et al., 2011). AMOT recruitment to cortical actin disrupts the AMOT-YAP inhibitory complex in the cell cytoplasm. This leaves YAP free to move into

the nucleus and trigger transcriptional responses critical for the maintenance of vascular lumen *in vivo* (Nakajima et al., 2017).

Yet another AMOT/Motin family member, Angiominin-like 2 (AMOTL2), acts as a scaffold protein linking VE-cadherin to contractile actin fibres. This function was shown to be critical for aortic lumen formation and expansion in zebrafish (Hultin et al., 2014). The function of AMOTL2 in linking VE-cadherin to MAGI1 bound actin filaments suggests that force transmission between neighbouring cells is critical for lumen expansion (Hultin et al., 2014). Upon AMOTL2 KO, the polarised endothelial cells lack radial actin filaments causing a collapse of the lumen and failed vessel morphogenesis (Hultin et al., 2014).

Another endothelial mechanosensor, Piezo1, responds to shear stress and sphingosine-1-phosphate through an increased calcium-gating function. This plays a crucial role in lumen formation in response to hemodynamic shear stress (Kang et al., 2019). Piezo1 facilitates F-actin alignment along the direction of flow (Ranade et al., 2014). Additionally, Piezo1 ion gating is sensitive to actin cytoskeletal and the lipid bilayer tension (Wang et al., 2022). Marcks11 is yet another recently described mechanoresponsive actin regulator in endothelial cells (Kondrychyn et al., 2020). Marcks11 directly binds to actin to regulate cell shape. Marcks11 promotes the formation of linear actin bundles while reducing the actin at the cell cortex, making the cell more pliable in response to shear stress. Lumen expansion requires thinning of apical cortical actin, and Marcks11 overexpression leads to increased vessel diameters (Kondrychyn et al., 2020). As a corollary,

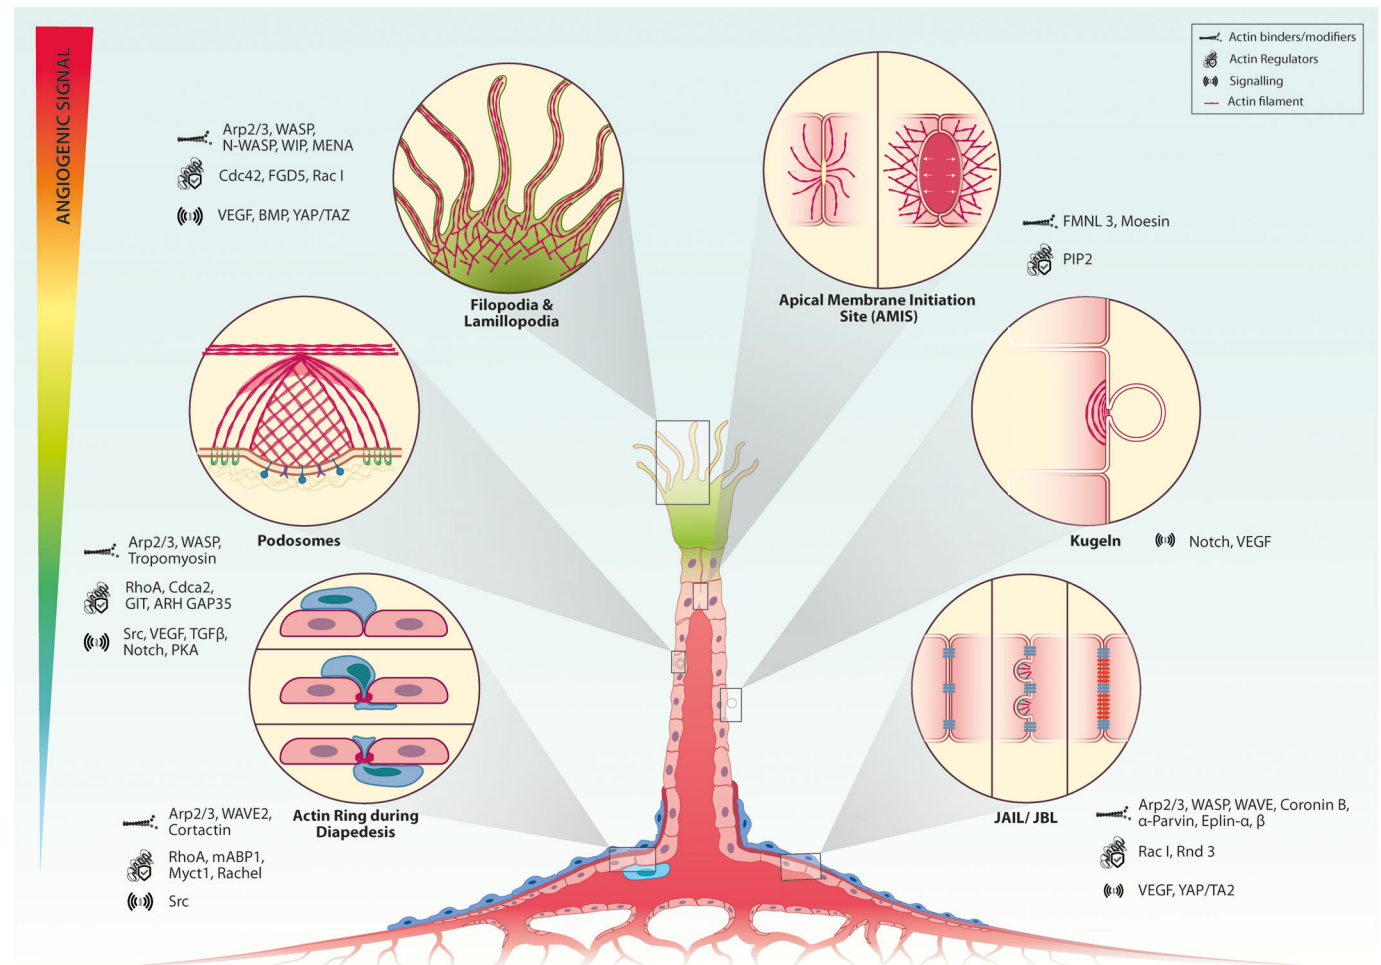

Fig. 1. Actin structures and dynamics in angiogenesis. Key signalling pathways and effectors are shown without being exhaustive.

the loss of Marcks11 causes delays in the lumenisation of vessels in zebrafish. While Marcks11 predominantly affects cell shape, endothelial cell numbers also determine the size of the lumen. Modulators of endothelial cell proliferation increase luminal diameter, like the protein intermidin. Intermidin forms a complex with Src and  $\beta$  arrestin1 to activate ERK signalling and endothelial cell proliferation to cause lumen enlargement (Wang et al., 2018). Whether the effect of intermidin on endothelial cell proliferation is dependent on its ability to inactivate the RhoA–ROCK pathway (Aslam et al., 2011; Aslam et al., 2012) needs to be investigated.

Vascular endothelial protein tyrosine phosphatase (VE-PTP/PTP-RB) is an endothelium-enriched gene that dephosphorylates substrates present in the endothelial cell junctions such as Tie-2, VE-cadherin, and plakoglobin (Dominguez et al., 2007b; Winderlich et al., 2009). VE-PTP has also been found to associate with and dephosphorylate VEGFR2 (Mellberg et al., 2009). Studies reveal that shear-induced stress in endothelial cells leads to the polarised distribution of VE-PTP at the downstream edge of cells relative to the direction of flow (Mantilidewi et al., 2014). Shear-stress-induced VE-PTP distribution and internalisation is disrupted by inhibition of actin polymerisation and Cdc42 activity, indicating that VE-PTP activity in endothelial cells requires the reorganisation of the actin cytoskeleton (Mantilidewi et al., 2014). VE-PTP deletion results in embryonic lethality due to a failure to form branched vascular networks (Dominguez et al., 2007a).

### Endothelial actin in leukocyte diapedesis

Trans-endothelial migration (TEM) refers to immune cells crossing the endothelial barrier during inflammation and immune surveillance. Leukocyte recruitment involves initial rolling, arrest and finally transmigration. The leukocytes migrate either directly through the individual microvascular endothelial cells (transcellular route) or between adjacent cells (paracellular route). Leukocytes form invasive podosomes to establish a transcellular pore in endothelial cells. The leukocytes initially extend a filopodia-like structure into the endothelial membrane or their paracellular junctions during diapedesis. This structure elongates to form a leading edge in the migrating cell and is termed the 'pseudopodium'. Rac1, Rac2, and Cdc42 stabilise these pseudopodia for pore generation during TEM (Heasman and Ridley, 2008). The pores are maintained by F-actin-rich rings that are formed around squashed leukocytes during diapedesis. The actin rings are regulated by RhoA (Heemskerk et al., 2016).

During paracellular transmigration, many adhesive interactions, including the JAM-A, PECAM-1, and CD99, are exploited by the leukocytes (Sullivan and Muller, 2014). Moreover, the VE-cadherin/ $\alpha$  catenin must be disassembled from the actin cytoskeleton for the dissolution of adherent junctions of endothelial cells (Vestweber, 2012). The attachment of leukocytes to endothelial cells requires WAVE2- and Arp2/3-driven actin polymerisation, which creates a docking structure (Mooren et al., 2014). WAVE2 localises to the transcellular pore, and its knockdown reduces transcellular migration of leukocytes with no effect on paracellular migration (Mooren et al., 2014). Thus, distinct endothelial actin modulators govern the route of leukocyte diapedesis.

Endothelial intercellular adhesion molecule (ICAM1) is a key regulator of leukocyte transmigration as it interacts directly with leukocyte  $\beta$ 2 integrins. ICAM1 clustering enables binding to leukocyte integrins, facilitating leukocyte adhesion. ICAM1 clusters recruit  $\beta$  actin and filamin. Cortactin dynamically links ICAM to actin and studies demonstrate that the tyrosine phosphorylation of cortactin by Src is essential for actin remodelling. Indeed, knockdown of cortactin in endothelial cells reduces actin-ICAM

clustering around adherent PMNs (Yang et al., 2006). Clustering of ICAM also results in the rise in the concentration of intracellular calcium ( $\text{Ca}^{2+}$ ) and p38 mitogen-activated protein kinase (MAPK) (Hu et al., 2000). Actin polymerisation is critical for further ICAM1 recruitment and growth of clusters. Actin-dependent inside-out regulation of ICAM1 in the endothelium is therefore essential for leukocyte transmigration (van Buul et al., 2010). Together, ICAM1 dependent coupling of actin to the TEM site feeds forward to allow the completion of TEM without significant barrier disruption.

Mammalian actin binding protein 1 (mABP1) also plays a specific role in trans-endothelial leukocyte migration under shear stress. The protein is enriched in the leading edge and causes dynamic actin rearrangements in the lamellipodia. Furthermore, the binding of mABP1 to actin is modulated by  $\beta$ 2 integrin driven leukocyte adhesion to endothelium, suggesting that actin remodelling by partners with changing binding affinities could coordinate the multistep process of leukocyte diapedesis (Hepper et al., 2012).

Another gene with near exclusive endothelial cell expression, Myct1, was shown to be critical in the context of tumour angiogenesis where targeting Myct1 showed promises in the tumour vessel normalisation. This is because Myct1 deficient endothelial cells facilitate trans-endothelial migration of cytotoxic T lymphocytes. This increased T cell migration phenotype upon Myct1 depletion is abolished by pharmacological Rac1 inhibition. Myct1 deficient endothelial cells have increased expression of Rac1 associated effectors like Trio and Tiam alongside increased expression of adhesion molecules like E selectin, P selectin, ICAM and VCAM (at mRNA level). Together, this suggests that increased junctional Rac1 activation could facilitate TEM of immune cells (Kabir et al., 2021). Since Rac1 is indeed a key player in the junctional lamellipodia (JBL and JAIL) formation, its hyperactivation could lead to more fluid membrane dynamics and consequently less resistance for cell migration across endothelial cells. Since Rac1 deficient endothelial cells show hemorrhagic manifestations, Rac1 is essential for embryonic vascular integrity (Nohata et al., 2016; see also table 2). Trans-endothelial migration of carcinoma cells was previously demonstrated to be Rac1 dependent with Rac1 knockdown or single copy deletion *in vivo* attenuating carcinoma cell trans-endothelial migration and hematogenous spread. Conversely, VEGF-induced Rac1 activation supported trans-endothelial migration of tumour cells (Yao et al., 2015). Indeed, Rac1 activation at junctions seems to be conducive to trans-endothelial cell migration of both tumour cells and lymphocytes.

### Actin in endothelial to mesenchymal transition (EndMT)

EndMT is a cellular transdifferentiation process similar to the epithelial to mesenchymal transition (EMT), which occurs in both developmental and pathological settings. Endothelial cells lose their cobblestone morphology during this transition by reducing many junctional proteins like CD31 (PECAM), ZO1, and VE-cadherin. A switch in polarisation ensues and results in the acquisition of the classical mesenchymal markers like vimentin, N cadherin, and  $\alpha$  smooth muscle actin ( $\alpha$ SMA). EndMT has a role in the embryonic development of cardiac valves and in human diseases like malignancies, fibrotic diseases, pulmonary arterial hypertension, atherosclerosis, and diabetes mellitus (Bischoff, 2019). The remarkable change in cell shape and acquisition of motility is accompanied by actin cytoskeletal reorganisation.

Actin dynamics in EndMT are initiated downstream of the classical TGF $\beta$  signalling pathway. While TGF $\beta$  through Smad2/4 upregulates EndMT transcription factors like Snail, Slug, Twist, and MRTF-A, the signalling pathway activates RhoGTPases RhoA,

**Table 2. Angiogenic phenotypes of mice models of actin regulator deletions.**

| Actin regulator          | Deletion phenotype                                                                                                                                                                                                                                                                                                                                                                                                                                       | References                                                                                                                              |
|--------------------------|----------------------------------------------------------------------------------------------------------------------------------------------------------------------------------------------------------------------------------------------------------------------------------------------------------------------------------------------------------------------------------------------------------------------------------------------------------|-----------------------------------------------------------------------------------------------------------------------------------------|
| $\beta$ -actin           | Homozygous null-embryonic lethality by E7.5                                                                                                                                                                                                                                                                                                                                                                                                              | Shmerling et al., 2005, Bunnell et al., 2011<br><i>Actb</i> <sup>-/-</sup>                                                              |
| $\gamma$ -actin          | Viable. Stunted growth and perinatal death within 48 h of birth, compensatory upregulation of $\beta$ -Actin. Progressive hearing loss in adulthood                                                                                                                                                                                                                                                                                                      | Belyantseva et al., 2009, Bunnell and Ervasti, 2010<br><i>Actg1</i> <sup>-/-</sup>                                                      |
| Thymosin $\beta$ 4       | Global KO mice are viable, fertile and show normal heart and blood vessel formation. Haemorrhaging and coronary vasculature developmental defects with incomplete penetrance also reported                                                                                                                                                                                                                                                               | Banerjee et al., 2012<br><i>t<math>\beta</math>4</i> <sup>-/-</sup> ; Rossdeutsch et al., 2012                                          |
| Profilin1                | Homozygous Profilin1 KOs die at the two-cell stage; Heterozygotes show maternal effect with increased embryonic and perinatal lethality in heterozygotic mothers. Pfn1 heterozygotic embryonic fibroblasts have normal cytoskeletal architecture<br>EC-specific non-tyr 129-phosphorylatable profilin expression leads to normal developmental and postnatal retinal angiogenesis, reduced wound healing angiogenesis, and ischaemic angiogenic response | Witke et al., 2001<br>Fan et al., 2012; Tie2-Cre; Pfn <sup>fl/fl</sup> Y129F                                                            |
| Arp2/3                   | Defective in endothelial long lamellipodial protrusions, loss of invasive potential in postnatal inducible endothelial cell specific Arp2/3 complex component ArpC4 KO                                                                                                                                                                                                                                                                                   | Figueiredo et al., 2021                                                                                                                 |
| YAP/TAZ                  | Embryonic inactivation- developmental arrest, impaired vascularisation, and embryonic lethality<br>Postnatal inactivation-reduced branching and reduced radial outgrowth of retinal vessels, haemorrhaging, reduced expression of actin cytoskeletal regulators                                                                                                                                                                                          | Wang et al., 2017<br>Cdh5(PAC)CreERT2/+; YAP/TAZ double-floxed mice                                                                     |
| FAK                      | Defective angiogenesis during late embryogenesis along with embryonic lethality                                                                                                                                                                                                                                                                                                                                                                          | Shen et al., 2005                                                                                                                       |
| VEGFR-1/VEGFR-2/VEGFR-3  | Uncontrolled endothelial cell differentiation, formation of severely disorganised vascular structures, embryonic lethality at E8.5/defects in the formation of hematopoietic and endothelial cells and embryonic lethality in utero in between E8.5 and E9.5/failure to develop a proper vasculature, embryonic lethality at E9.5                                                                                                                        | Dumont et al., 1998, Fouad Shalaby et al., 1995, Guo-Hua Fong et al., 1995, 1999                                                        |
| Rac1                     | Embryonic inactivation- haemorrhage and reduced vascular network; embryonic lethality due to defective development of major vessels and complete lack of small vessel branching<br>Postnatal inactivation- delayed and aberrant retinal angiogenesis at P8, reduced formation of the deep-plexus network at P10                                                                                                                                          | Nohata et al., 2016; Cdh5(PAC)-iCreERT2<br>( <i>Rac1</i> <sup>fl/fl</sup> )                                                             |
| RhoJ (whole-body KO)     | Delayed neonatal retinal vascularisation; normal growth, not essential for embryonic development/ growth retardation and defects in vascular development                                                                                                                                                                                                                                                                                                 | Shi et al., 2016, Fukushima et al., 2011, Takase et al., 2012, Wilson et al., 2014                                                      |
| Cdc42                    | Embryonic inactivation: blocked lumen formation, endothelial tearing, and <i>in utero</i> death due to blood vessel defects between E9 and E10.5<br>Postnatal Inactivation: aberrant vascular remodeling and sprouting along with reduced filopodia formation                                                                                                                                                                                            | Barry et al., 2015                                                                                                                      |
| RhoA                     | Embryonic inactivation: did not present anatomic and behavioural deficiencies, decreased survival but not detrimental for embryonic development                                                                                                                                                                                                                                                                                                          | Zahra et al., 2019                                                                                                                      |
| $\alpha$ -Parvin         | Embryonic inactivation: late embryonic lethality at E14.5 associated with hemorrhages and reduced vascular density<br>Postnatal inactivation: retinal hypovascularisation due to reduced vessel sprouting and increased vessel regression                                                                                                                                                                                                                | Fraccaroli et al., 2015; Tie2-Cre // ( $\alpha$ -pv <sup>fl/fl</sup> ); Cdh5(PAC)-CreERT2 <sup>23</sup> ; $\alpha$ -pv <sup>fl/fl</sup> |
| Ena/VASP                 | Embryonic lethality due to edema and hemorrhage as a result of barrier disruption                                                                                                                                                                                                                                                                                                                                                                        | Furman et al., 2007                                                                                                                     |
| WAVE2                    | Developmental delay and growth retardation, embryonic lethality due to hemorrhage/edema of heart                                                                                                                                                                                                                                                                                                                                                         | Yamazaki et al., 2003                                                                                                                   |
| Piezo 1 (whole-body KO)  | Normal vasculogenesis till E9.5, growth retardation, pericardial effusion starting at E9.5, defective vascular remodelling followed by embryonic lethality at E14.5                                                                                                                                                                                                                                                                                      | Ranade et al., 2014                                                                                                                     |
| Moesin 1 (whole-body KO) | Viable with no gross abnormalities, no compensatory increase in other ERM family proteins                                                                                                                                                                                                                                                                                                                                                                | Doi et al., 1999                                                                                                                        |
| RASIP1                   | Embryonically lethal at E10.5 due to failure to form patent lumens in all blood vessels and endocardial arrest, defective establishment of cell polarity and impaired tubulogenesis                                                                                                                                                                                                                                                                      | Xu et al., 2011                                                                                                                         |
| VE-PTP                   | Embryonic lethality by E10 due to defects in angiogenesis including failure to form branched vascular networks                                                                                                                                                                                                                                                                                                                                           | Dominguez et al., 2007b                                                                                                                 |
| $\beta$ 1 integrin       | Vascular rupture and hemorrhage resulting in embryonic lethality                                                                                                                                                                                                                                                                                                                                                                                         | Zovein et al., 2010                                                                                                                     |
| CASZ1                    | Myocardial hypoplasia, ventricular septal defect, and defective cardiac morphology leading to heart failure and embryonic lethality                                                                                                                                                                                                                                                                                                                      | Liu et al., 2014                                                                                                                        |
| Egfl7                    | Partial embryonic lethality and vascular abnormalities                                                                                                                                                                                                                                                                                                                                                                                                   | Schmidt et al., 2007                                                                                                                    |

Continued



Table 2. Continued

| Actin regulator                                                        | Deletion phenotype                                                                                                                                                                                                                                                                                                                                                                                       | References                                                                                                |
|------------------------------------------------------------------------|----------------------------------------------------------------------------------------------------------------------------------------------------------------------------------------------------------------------------------------------------------------------------------------------------------------------------------------------------------------------------------------------------------|-----------------------------------------------------------------------------------------------------------|
| Sphingosine 1 phosphate receptor 1 (S1PR1) - Edg1                      | Embryonic lethality due to vascular hemorrhage at E12.5 to E14.5 reduced Rac activation                                                                                                                                                                                                                                                                                                                  | Liu et al., 2000                                                                                          |
| $\beta$ catenin                                                        | In utero death in between E11.5 and E13.5 due to defective vasculogenesis along with irregular lumen formation, frequently hemorrhagic vessels, and cytoskeletal disruption                                                                                                                                                                                                                              | Liebner et al., 2004; Tie2 Cre; $\beta$ -catenin <sup>fl/fl</sup>                                         |
| Nck                                                                    | Impaired cardiovascular development, angiogenic defects, and embryonic lethality at E9.5-11.5                                                                                                                                                                                                                                                                                                            | Clouthier et al., 2015; Tie2 Cre; Nck1 <sup>-/-</sup> and Nck2 <sup>fl/fl</sup>                           |
| Nck 1 null mice show no vascular defects; hence Nck1/2 double KOs used | Postnatal deletion; severely impaired retinal angiogenesis, the number of sprouts reduced, filopodia normal, reduced endothelial cell proliferation, impaired front-rear polarity<br>Embryonic deletion at E9.5; reduced vascular density and branching by E11                                                                                                                                           | Dubrac et al., 2016; Cdh5Cre <sup>ERT2</sup> Nck1 <sup>-/-</sup> and Nck2 <sup>fl/fl</sup>                |
| ROCK (whole-body KO)                                                   | ROCK-I null mice: perinatal death due to abnormal accumulation of filamentous actin that leads to impairment in umbilical ring closure. Possibly functional compensation by ROCK-II<br>ROCK-II-null mice die in utero after E13.5 due to placental dysfunction and thrombosis. No defects in actin stress fibres in primary trophoblasts of null mice.                                                   | Shimizu et al., 2005<br>Thumkeo et al., 2003                                                              |
| AMOT                                                                   | Whole-body KO: vascular defects, dilated brain and intersomitic vessels, no branching defects and 75% embryonic lethality at E7.5-E11, isolated primary Amot <sup>-/-</sup> ECs show increased Rac1 activity<br>Endothelium specific KO: reduced postnatal retinal vessel expansion, reduced number of tip cells, reduced filopodia, reduced tip cell positioning                                        | Aase et al., 2007<br>Zhang et al., 2021; Cdh5 (PAC) <sup>CreERT2</sup> ; Amot exon4 and 5 flanked by LoxP |
| VE-cadherin                                                            | Embryonic lethality at E9.5, no defects in vasculogenesis but severe defects in aortic lumen formation and sprouting angiogenesis with endothelial cell apoptosis                                                                                                                                                                                                                                        | Carmeliet et al., 1999                                                                                    |
| CCM1/2                                                                 | Embryonic lethality due to defects in heart, arterial and venous morphogenesis affecting angiogenesis                                                                                                                                                                                                                                                                                                    | Boulday et al., 2011, Lampugnani et al., 2010                                                             |
| GIT1                                                                   | Whole-body KO: death within 10 days after birth, respiratory distress due to defective pulmonary vascular development; reduced retinal sprouting angiogenesis<br>Endothelial KO: expression in stalk cells, retinal vasculature at P5 showed reduced vessel length, branch points, and filopodia                                                                                                         | Pang et al., 2009, Majumder et al., 2016<br>Majumder et al., 2016, Tie2-Cre; floxed GIT1                  |
| IQGAP1 (whole-body KO)                                                 | Normal except for gastric hyperplasia                                                                                                                                                                                                                                                                                                                                                                    | Phng et al., 2009                                                                                         |
| PDXL                                                                   | Perinatal death at P1 due to renal failure, no defects in vasculature due to compensatory overexpression of other CD34 sialomucins<br>Endothelial depletion, death 3 months after birth, inflammatory exudates around vessels, loss of stability of junctions. Derived lung endothelial cells show increased F-actin stress fibres, phosphorylation of ERM complex, and RhoA activity following thrombin | Doyonnas et al., 2001, Horrillo et al., 2016                                                              |

RhoB, Rac1, and Cdc42 in a Smad-independent manner to orchestrate cytoskeletal reorganisation (Ciszewski et al., 2017). The adapter protein Nck is also a critical actin regulator in the context of EndMT as well. During the development of the heart valve, cardiac cushions are formed through EndMT of a subset of endothelial cells (Armstrong and Bischoff, 2004). In mice with endothelium-specific Nck KO, this transition is delayed, suggesting that Nck is required for EndMT *in vivo* (Clouthier et al., 2015). Cells lacking Nck protein display reduced RhoA and increased Rac1 activity, resulting in altered actin organisation with defects in cell migration (Clouthier et al., 2015). Thus Nck, TGF $\beta$ , canonical Wnt, and Notch signals promote EndMT, while FGFR1 and BMPR2 signals often counteract TGF $\beta$  to suppress EndMT Figure 2. Readers are referred to reviews (Souilhol et al., 2018; Lin et al., 2012; Pira-Velazquez and Jimenez, 2019) for details of pathways driving EndMT.

EndMT occurs in various pathophysiological conditions in response to inflammation, shear stress, cyclical strain, and oxidative stress (Krenning et al., 2016). Several of these upstream cues also modulate Rho GTPase activity, and generally, we find an increase in RhoA

coupled to a reduction in Rac1 activity favouring EndMT. However, a few studies also propose a reduction in RhoA activity during EndMT. TGF $\beta$  induced miRNAs miR-27 and miR-31 target Vav3, a GEF for RhoA (Muller et al., 2020), promoting EndMT (Katsura et al., 2016; Suzuki et al., 2017). Since the bulk of scientific evidence supports RhoA as the central effector of EndMT, the miRNA-mediated Vav3 targeting should be revisited in this context.

RhoJ activates EndMT downstream of hypoxia through transcriptional activation of EMT transcription factors like Snail and Twist (Liu et al., 2018). However, how hypoxia causes RhoJ activation and RhoJ-dependent upregulation of histone H3K4 methyl transferase WDR5 to promote EndMT remains a mystery. Surprisingly, this study does not address the role of RhoJ in coordinating actin reorganisation during EndMT, a likely avenue of research in the future.

#### Actin in endothelial phagocytosis-like processes

Endothelial phagocytosis is a surveillance strategy to remove foreign particles from the blood. In *Listeria* infection, endothelial cell behaves as a non-specialised phagocyte, with *Listeria* adhesion and phagocytosis-like uptake process. PI3K/FAK/Rho and FMNL3 are

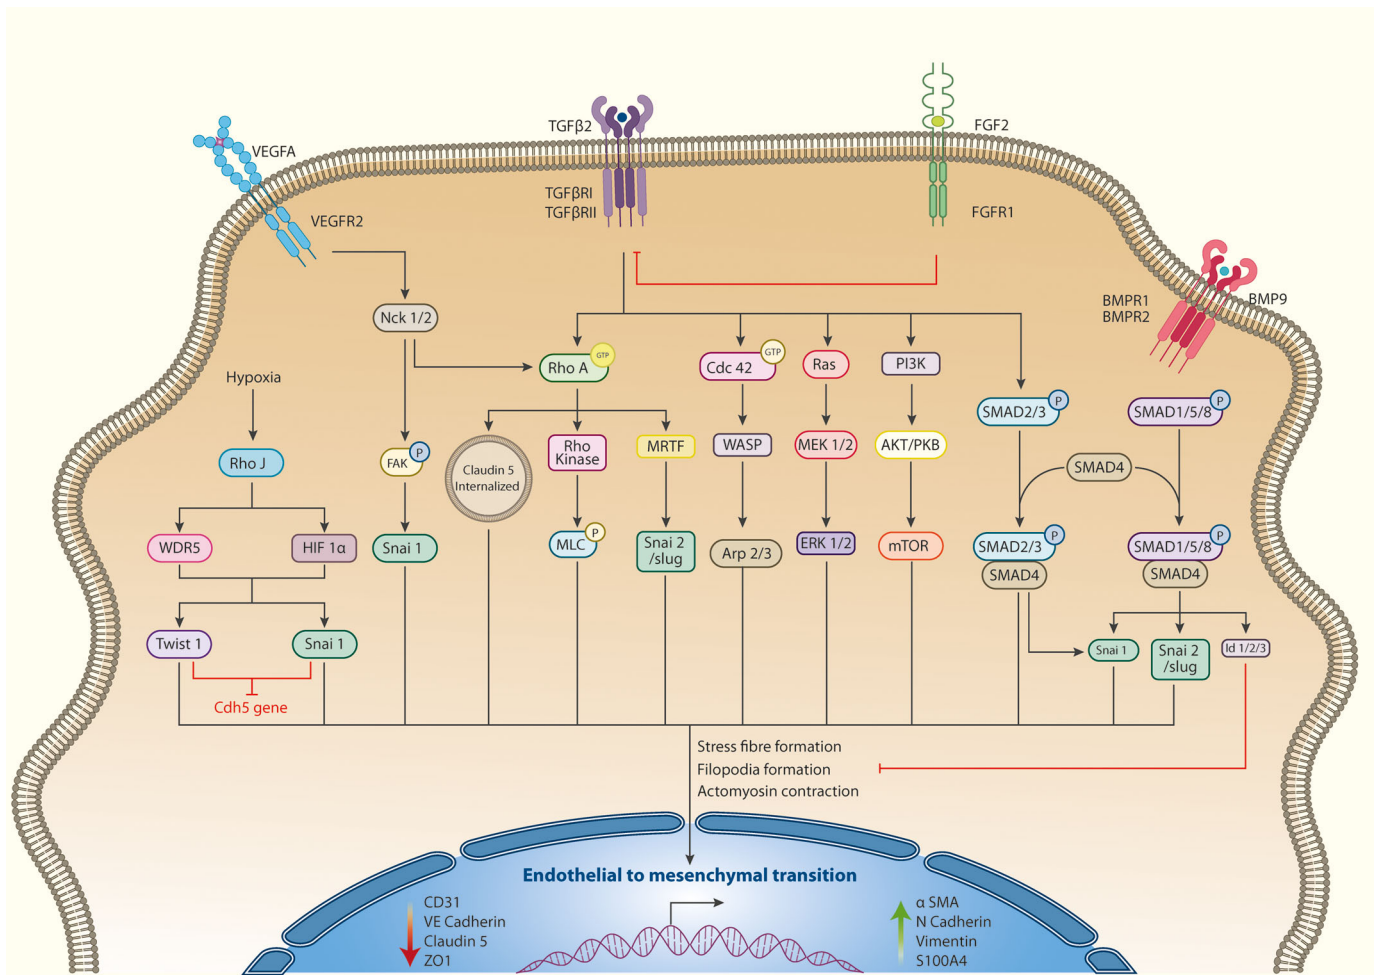

Fig. 2 Signalling pathways regulating actin in endothelial to mesenchymal transition.

the key players of endothelial phagocytosis-like processes. *Listeria monocytogenes* exploits the endothelial phagocytosis-like process for entry, using its Act A protein as an Arp2/3 activator. The bacterium then uses actin comet tails to move freely in the endothelial cell cytoplasm. RhoGTPase effector kinase (ROCK) helps in the adhesion of *Listeria* onto the HUVEC. The internalisation is controlled by the combined action of the Formin family of nucleators (FHOD1 and FMNL3) and actin polymerisation proteins (Nck 1, DLG1, Rac2, PFN1, and MYO9A), and consequently need less cellular Arp 2/3 activity (Rengarajan et al., 2016). Endothelial cells are also known to internalise/phagocytose senescent neutrophils, apoptotic debris, and neutrophil extracellular traps (NETs). If NETs are not promptly cleared by endothelial phagocytosis, they promote vascular leakiness and EndMT (Pieterse et al., 2017).

**Actin in vascular matrix remodelling**

Endothelial cells along with the supporting cells assemble a laminin rich basement membrane in quiescent vessels. This basement membrane is degraded during angiogenic invasion using matrix metalloproteinases (Davis and Senger, 2005). Indeed, the angiogenic ECM is rich in fibronectin and serves as a mechanical support to organise the sprout. Additionally, the angiogenic ECM determines growth factor availability and influences the gradient of growth factors available to tip and stalk cells. ECM signals through integrins to regulate cell behaviour and polarity. As is well appreciated in other tissues, endothelial remodelling of the ECM

is dependent on actin cytoskeletal tension exerted on the ECM proteins through integrins to unfurl and cause the crosslinking of matrix. For example, endothelial fibronectin remodelling is regulated by the trafficking of active  $\alpha5\beta1$  integrins. The antagonistic action of the two RhoGTPases, RhoJ and Cdc42, govern the trafficking of integrins to finetune fibrillogenesis at the angiogenic front (Sundararaman et al., 2020; Sundararaman and Mellor, 2020). Collagen I instructs endothelial morphogenesis by promoting actin polymerisation into stress fibres. This is specific to dermal endothelial cells and achieved by ligation of Collagen I to integrin receptors with subsequent suppression of PKA activity (Whelan and Senger, 2003). Together, we have actin regulation of matrix bundling and matrix molecules in turn altering actin cytoskeletal organisation for vascular morphogenesis.

**Role of actin regulators in developmental and postnatal angiogenesis - lessons from global and conditional KO mice models**

Several actin regulators are critical for vasculogenesis and early angiogenesis, leading to embryonic lethality in KO animals. We presently have a more nuanced understanding of the role of actin cytoskeletal regulators through endothelial cell specific KO animal models where the deletion is induced in late embryonic and postnatal mice. A compilation of the phenotypes of actin regulators; whole body, and conditional endothelial cell KOs in mice are given in Table 2.

## Conclusions and future directions

In this synthesis of the literature, we provide a conceptual framework to understand actin regulation in endothelial cells. The RhoGTPase family of proteins, particularly RhoA, Rac1, and Cdc42, play crucial roles in coordinating actin remodelling during angiogenesis. We are now beginning to realise the role of less-studied members of this family like RhoB (Gerald et al., 2013; Wheeler and Ridley, 2004), RhoC (Del Galdo et al., 2013), RhoG (Abraham et al., 2015), and RhoJ (Fukushima et al., 2020; Sundararaman and Mellor, 2020; Kim et al., 2014; Kusuhara et al., 2012; Leszczynska et al., 2011) in angiogenesis. We are only beginning to understand the role of crosstalk between RhoGTPase family members and their competition for common substrates/ effectors in the process of angiogenesis (Sundararaman and Mellor, 2020). In other systems, we are aware of extensive crosstalk between RhoGTPase family members to achieve spatially restricted RhoGTPase activation (Muller et al., 2020). This is only compounded by the presence of several shared regulators - the GEFs and GAPs (Muller et al., 2020) and GDI proteins (Garcia-Mata et al., 2011). Rho GTPases lacking GTPase activity, like the Rnd subfamily and RhoH, inhibit the RhoA and Rac GTPases respectively and play crucial roles in fine-tuning their activity in other systems (Li et al., 2002; Tajadura-Ortega et al., 2018; Wennerberg et al., 2003). There is a need to explore the crosstalk between the RhoGTPase family members in angiogenesis to define the spatial and temporal regulation of actin dynamics at various stages of angiogenesis.

Pro-angiogenic and anti-angiogenic stabilising signals are activated in a temporally coordinated fashion to enable the sprouting and luminisation of new vessels. VEGF and Notch signalling, Semaphorin-PlexinD1 signalling, Slit-Robo pathways, and the mechano-sensitive YAP/TAZ pathways; all play key roles in coordinating the multi-step angiogenesis program. Actin dynamics is the end-point effector for all these pathways to bring about endothelial shape changes and vascular morphogenesis.

It is essential to look closely at endothelium-enriched actin regulators, particularly those that have arisen in the vertebrates with the advent of the closed-blood vascular system. Proteins like ARHGEF15 and its substrate RhoJ (Takase et al., 2012) fine-tune actin remodelling by more ancestral regulators in endothelial cells during angiogenesis. These proteins could be a key to understanding how actin regulation is tailored to suit the unique roles of the endothelium in our body. Actin dynamics is at the crux of endothelial plasticity. Recently discovered membrane protrusions like JAIL and dactylopodia needs to be further investigated in physiological and pathological angiogenesis. With the advent of single-cell RNAseq and spatial transcriptomic studies, we are unearthing endothelial cell fate transitions inherent in the development and maintenance of vasculature. With the phenotypic specialisation of the endothelium in distinct organs, a corresponding nuanced modulation of actin to give rise to distinct actin-based structures is expected, but the molecular details remain unknown, warranting further study.

## Acknowledgements

We apologise to colleagues whose work could not be cited due to space constraints. We thank Professor Harry Mellor, University of Bristol, for his insights into the actin biology of the endothelium.

## Competing interests

The authors declare no competing or financial interests.

## Funding

Funding from Department of Biotechnology, Government of India to A.S. (BT/RLF/ Re-entry/51/2019)

## References

- Aase, K., Ernkvist, M., Ebarasi, L., Jakobsson, L., Majumdar, A., Yi, C., Birot, O., Ming, Y., Kvanta, A., Edholm, D. et al. (2007). Angiotensin regulates endothelial cell migration during embryonic angiogenesis. *Genes Dev.* **21**, 2055-2068. doi:10.1101/gad.432007
- Abraham, S., Scarcia, M., Bagshaw, R. D., McMahon, K., Grant, G., Harvey, T., Yeo, M., Esteves, F. O., Thygesen, H. H., Jones, P. F. et al. (2015). A Rac/Cdc42 exchange factor complex promotes formation of lateral filopodia and blood vessel lumen morphogenesis. *Nat. Commun.* **6**, 7286. doi:10.1038/ncomms8286
- Abu Taha, A., Taha, M., Seebach, J. and Schnittler, H. J. (2014). ARP2/3-mediated junction-associated lamellipodia control VE-cadherin-based cell junction dynamics and maintain monolayer integrity. *Mol. Biol. Cell* **25**, 245-256. doi:10.1091/mbc.e13-07-0404
- Adyshev, D. M., Moldobaeva, N. K., Elangovan, V. R., Garcia, J. G. and Dudek, S. M. (2011). Differential involvement of ezrin/radixin/moesin proteins in sphingosine 1-phosphate-induced human pulmonary endothelial cell barrier enhancement. *Cell. Signal.* **23**, 2086-2096. doi:10.1016/j.cellsig.2011.08.003
- Akwii, R. G., Sajib, M. S., Zahra, F. T., Tullar, P., Zabet-Moghaddam, M., Zheng, Y., Silvio Gutkind, J., Doci, C. L. and Mikelis, C. M. (2022). Angiopoietin-2-induced lymphatic endothelial cell migration drives lymphangiogenesis via the  $\beta 1$  integrin-RhoA-formin axis. *Angiogenesis* **25**, 373-396. doi:10.1007/s10456-022-09831-y
- Allain, B., Jarray, R., Borriello, L., Leforban, B., Dufour, S., Liu, W. Q., Pamonsinlatham, P., Bianco, S., Larghero, J., Hadj-Slimane, R. et al. (2012). Neuropilin-1 regulates a new VEGF-induced gene, Phactr-1, which controls tubulogenesis and modulates lamellipodial dynamics in human endothelial cells. *Cell. Signal.* **24**, 214-223. doi:10.1016/j.cellsig.2011.09.003
- Armstrong, E. J. and Bischoff, J. (2004). Heart valve development: endothelial cell signaling and differentiation. *Circ. Res.* **95**, 459-470. doi:10.1161/01.RES.0000141146.95728.da
- Aslam, M., Gunduz, D., Schuler, D., Li, L., Sharifpanah, F., Sedding, D., Piper, H. M. and Noll, T. (2011). Intermedin induces loss of coronary microvascular endothelial barrier via derangement of actin cytoskeleton: role of RhoA and Rac1. *Cardiovasc. Res.* **92**, 276-286. doi:10.1093/cvr/cvr213
- Aslam, M., Pfeil, U., Gunduz, D., Rafiq, A., Kummer, W., Piper, H. M. and Noll, T. (2012). Intermedin (adrenomedullin2) stabilizes the endothelial barrier and antagonizes thrombin-induced barrier failure in endothelial cell monolayers. *Br. J. Pharmacol.* **165**, 208-222. doi:10.1111/j.1476-5381.2011.01540.x
- Bajusz, C., Borkuti, P., Kristo, I., Kovacs, Z., Abonyi, C. and Vilmos, P. (2018). Nuclear actin: ancient clue to evolution in eukaryotes? *Histochem. Cell Biol.* **150**, 235-244. doi:10.1007/s00418-018-1693-6
- Banerjee, I., Zhang, J., Moore-Morris, T., Lange, S., Shen, T., Dalton, N. D., Gu, Y., Peterson, K. L., Evans, S. M. and Chen, J. (2012). Thymosin beta 4 is dispensable for murine cardiac development and function. *Circ. Res.* **110**, 456-464. doi:10.1161/CIRCRESAHA.111.258616
- Barry, D. M., Xu, K., Meadows, S. M., Zheng, Y., Norden, P. R., Davis, G. E. and Cleaver, O. (2015). Cdc42 is required for cytoskeletal support of endothelial cell adhesion during blood vessel formation in mice. *Development* **142**, 3058-3070. doi:10.1242/dev.124677
- Barzik, M., Kotova, T. I., Higgs, H. N., Hazelwood, L., Hanein, D., Gertler, F. B. and Schafer, D. A. (2005). Ena/VASP proteins enhance actin polymerization in the presence of barbed end capping proteins. *J. Biol. Chem.* **280**, 28653-28662. doi:10.1074/jbc.M503957200
- Belyantseva, I. A., Perrin, B. J., Sonnemann, K. J., Zhu, M., Stepanyan, R., Mcgee, J., Frolenkov, G. I., Walsh, E. J., Friderici, K. H., Friedman, T. B. et al. (2009). Gamma-actin is required for cytoskeletal maintenance but not development. *Proc. Natl. Acad. Sci. USA* **106**, 9703-9708. doi:10.1073/pnas.0900221106
- Benz, P. M., Blume, C., Moebius, J., Oschatz, C., Schuh, K., Sickmann, A., Walter, U., Feller, S. M. and Renné, T. (2008). Cytoskeleton assembly at endothelial cell-cell contacts is regulated by alphaIIb-spectrin-VASP complexes. *J. Cell Biol.* **180**, 205-219. doi:10.1083/jcb.200709181
- Birukova, A. A., Fu, P., Wu, T., Dubrovskiy, O., Sarich, N., Poroyko, V. and Birukov, K. G. (2012). Afadin controls p120-catenin-ZO-1 interactions leading to endothelial barrier enhancement by oxidized phospholipids. *J. Cell. Physiol.* **227**, 1883-1890. doi:10.1002/jcp.22916
- Bischoff, J. (2019). Endothelial-to-Mesenchymal Transition. *Circ. Res.* **124**, 1163-1165. doi:10.1161/CIRCRESAHA.119.314813
- Boulday, G., Rudini, N., Maddaluno, L., Blecon, A., Arnould, M., Gaudric, A., Chapon, F., Adams, R. H., Dejana, E. and Tournier-Lasserre, E. (2011). Developmental timing of CCM2 loss influences cerebral cavernous malformations in mice. *J. Exp. Med.* **208**, 1835-1847. doi:10.1084/jem.20110571
- Bunnell, T. M. and Ervasti, J. M. (2010). Delayed embryonic development and impaired cell growth and survival in Actg1 null mice. *Cytoskeleton (Hoboken)* **67**, 564-572. doi:10.1002/cm.20467
- Bunnell, T. M., Burbach, B. J., Shimizu, Y. and Ervasti, J. M. (2011). beta-Actin specifically controls cell growth, migration, and the G-actin pool. *Mol. Biol. Cell* **22**, 4047-4058. doi:10.1091/mbc.e11-06-0582
- Cao, J. and Schnittler, H. (2019). Putting VE-cadherin into JAIL for junction remodeling. *J. Cell Sci.* **132**, jcs222893. doi:10.1242/jcs.222893

- Cao, J., Ehling, M., Marz, S., Seebach, J., Tarbashevich, K., Sixta, T., Pitulescu, M. E., Werner, A. C., Flach, B., Montanez, E. et al. (2017). Polarized actin and VE-cadherin dynamics regulate junctional remodelling and cell migration during sprouting angiogenesis. *Nat. Commun.* **8**, 2210. doi:10.1038/s41467-017-02373-8
- Carmeliet, P., Lampugnani, M. G., Moons, L., Breviario, F., Compernelle, V., Bono, F., Balconi, G., Spagnuolo, R., Oosthuysse, B., Dewerchin, M. et al. (1999). Targeted deficiency or cytosolic truncation of the VE-cadherin gene in mice impairs VEGF-mediated endothelial survival and angiogenesis. *Cell* **98**, 147-157. doi:10.1016/S0092-8674(00)81010-7
- Cha, H. J., Jeong, M. J. and Kleinman, H. K. (2003). Role of thymosin beta4 in tumor metastasis and angiogenesis. *J. Natl. Cancer Inst.* **95**, 1674-1680. doi:10.1093/jnci/djg100
- Chang, E., Heo, K. S., Woo, C. H., Lee, H., Le, N. T., Thomas, T. N., Fujiwara, K. and Abe, J. (2011). MK2 SUMOylation regulates actin filament remodeling and subsequent migration in endothelial cells by inhibiting MK2 kinase and HSP27 phosphorylation. *Blood* **117**, 2527-2537. doi:10.1182/blood-2010-08-302281
- Chen, Q., Fan, K., Chen, X., Xie, X., Huang, L., Song, G. and Qi, W. (2021). Ezrin regulates synovial angiogenesis in rheumatoid arthritis through YAP and Akt signalling. *J. Cell. Mol. Med.* **25**, 9378-9389. doi:10.1111/jcmm.16877
- Cheng, C., Haasdijk, R., Tempel, D., Van De Kamp, E. H., Herpers, R., Bos, F., Den Dekker, W. K., Blondin, L. A., De Jong, R., Burgisser, P. E. et al. (2012). Endothelial cell-specific FGD5 involvement in vascular pruning defines neovessel fate in mice. *Circulation* **125**, 3142-3158. doi:10.1161/CIRCULATIONAHA.111.064030
- Ciszewski, W. M., Sobierajska, K., Wawro, M. E., Klopocka, W., Chefczynska, N., Muzyczuk, A., Siekacz, K., Wujkowska, A. and Niewiarowska, J. (2017). The ILK-MMP9-MRTF axis is crucial for EndMT differentiation of endothelial cells in a tumor microenvironment. *Biochim Biophys Acta Mol Cell Res* **1864**, 2283-2296. doi:10.1016/j.bbamcr.2017.09.004
- Clouthier, D. L., Harris, C. N., Harris, R. A., Martin, C. E., Puri, M. C. and Jones, N. (2015). Requisite role for Nck adaptors in cardiovascular development, endothelial-to-mesenchymal transition, and directed cell migration. *Mol. Cell Biol.* **35**, 1573-1587. doi:10.1128/MCB.00072-15
- Collins, K. B., Kang, H., Matsche, J., Klomp, J. E., Rehman, J., Malik, A. B. and Karginov, A. V. (2020). Septin2 mediates podosome maturation and endothelial cell invasion associated with angiogenesis. *J. Cell Biol.* **219**. e201903023. doi:10.1083/jcb.201903023
- Corada, M., Mariotti, M., Thurston, G., Smith, K., Kunkel, R., Brockhaus, M., Lampugnani, M. G., Martin-Padura, I., Stoppacciaro, A., Ruco, L. et al. (1999). Vascular endothelial-cadherin is an important determinant of microvascular integrity in vivo. *Proc. Natl Acad. Sci. USA* **96**, 9815-9820. doi:10.1073/pnas.96.17.9815
- Davis, G. E. and Senger, D. R. (2005). Endothelial extracellular matrix: biosynthesis, remodeling, and functions during vascular morphogenesis and neovessel stabilization. *Circ. Res.* **97**, 1093-1107. doi:10.1161/01.RES.0000191547.64391.e3
- Del Galdo, S., Vettel, C., Heringdorf, D. M. and Wieland, T. (2013). The activation of RhoC in vascular endothelial cells is required for the S1P receptor type 2-induced inhibition of angiogenesis. *Cell. Signal.* **25**, 2478-2484. doi:10.1016/j.cellsig.2013.08.017
- Doi, Y., Itoh, M., Yonemura, S., Ishihara, S., Takano, H., Noda, T. and Tsukita, S. (1999). Normal development of mice and unimpaired cell adhesion/cell motility/actin-based cytoskeleton without compensatory up-regulation of ezrin or radixin in moesin gene knockout. *J. Biol. Chem.* **274**, 2315-2321. doi:10.1074/jbc.274.4.2315
- Dominguez, M. G., Hughes, V. C., Pan, L., Simmons, M., Daly, C., Anderson, K., Noguera-Troise, I., Murphy, A. J., Valenzuela, D. M., Davis, S. et al. (2007a). Vascular endothelial tyrosine phosphatase (VE-PTP)-null mice undergo vasculogenesis but die embryonically because of defects in angiogenesis. *Proc. Natl. Acad. Sci. USA* **104**, 3243-3248. doi:10.1073/pnas.0611510104
- Dominguez, M. G., Hughes, V. C., Pan, L., Simmons, M., Daly, C., Anderson, K., Noguera-Troise, I., Murphy, A. J., Valenzuela, D. M., Davis, S. et al. (2007b). Vascular endothelial tyrosine phosphatase (VE-PTP)-null mice undergo vasculogenesis but die embryonically because of defects in angiogenesis. *Proc. Natl. Acad. Sci. U.S.A.* **104**, 3243-3248. doi:10.1073/pnas.0611510104
- Dominguez, R. and Holmes, K. C. (2011). Actin structure and function. *Annu. Rev. Biophys.* **40**, 169-186. doi:10.1146/annurev-biophys-042910-155359
- Doyonnas, R., Kershaw, D. B., Duhe, C., Merken, H., Chelliah, S., Graf, T. and McNagny, K. M. (2001). Anuria, omphalocele, and perinatal lethality in mice lacking the CD34-related protein podocalyxin. *J. Exp. Med.* **194**, 13-27. doi:10.1084/jem.194.1.13
- Dubrac, A., Genet, G., Ola, R., Zhang, F., Pibouin-Fragner, L., Han, J., Zhang, J., Thomas, J. L., Chedotal, A., Schwartz, M. A. et al. (2016). Targeting NCK-mediated endothelial cell front-rear polarity inhibits neovascularization. *Circulation* **133**, 409-421. doi:10.1161/CIRCULATIONAHA.115.017537
- Dugina, V. B., Shagieva, G. S., Shakhov, A. S. and Alieva, I. B. (2021). The cytoplasmic actins in the regulation of endothelial cell function. *Int. J. Mol. Sci.* **22**, 7836. doi:10.3390/ijms22157836
- Dumont, D. J., Jussila, L., Taipale, J., Lymboussaki, A., Mustonen, T., Pajusola, K., Breitman, M. and Alitalo, K. (1998). Cardiovascular Failure in Mouse Embryos Deficient in VEGF receptor 3. *Science* **282**, 946-949. doi:10.1126/science.282.5390.946
- Eelen, G., Treps, L., Li, X. and Carmeliet, P. (2020). Basic and Therapeutic Aspects of Angiogenesis Updated. *Circ. Res.* **127**, 310-329. doi:10.1161/CIRCRESAHA.120.316851
- Ernkvist, M., Luna Persson, N., Audebert, S., Lecine, P., Sinha, I., Liu, M., Schlueter, M., Horowitz, A., Aase, K., Weide, T. et al. (2009). The Amot/Pati/Syx signaling complex spatially controls RhoA GTPase activity in migrating endothelial cells. *Blood* **113**, 244-253. doi:10.1182/blood-2008-04-153874
- Fan, Y., Arif, A., Gong, Y., Jia, J., Eswarappa, S. M., Willard, B., Horowitz, A., Graham, L. M., Penn, M. S. and Fox, P. L. (2012). Stimulus-dependent phosphorylation of profilin-1 in angiogenesis. *Nat. Cell Biol.* **14**, 1046-1056. doi:10.1038/ncb2580
- Farhan, M. A., Azad, A. K., Touret, N. and Murray, A. G. (2017). FGD5 regulates VEGF receptor-2 coupling to PI3 kinase and receptor recycling. *Arterioscler. Thromb. Vasc. Biol.* **37**, 2301-2310. doi:10.1161/ATVBAHA.117.309978
- Fels, J., Jeggle, P., Kusche-Vihrog, K. and Oberleithner, H. (2012). Cortical actin nanodynamics determines nitric oxide release in vascular endothelium. *PLoS One* **7**, e41520. doi:10.1371/journal.pone.0041520
- Figueiredo, A. M., Barbacena, P., Russo, A., Vaccaro, S., Ramalho, D., Pena, A., Lima, A. P., Ferreira, R. R., El-Marjou, F., Carvalho, Y. et al. (2020). Endothelial cell invasiveness is controlled by myosin IIA-dependent inhibition of Arp2/3 activity. *bioRxiv*, 2020.09.08.287466.
- Figueiredo, A. M., Barbacena, P., Russo, A., Vaccaro, S., Ramalho, D., Pena, A., Lima, A. P., Ferreira, R. R., Fidalgo, M. A., El-Marjou, F. et al. (2021). Endothelial cell invasion is controlled by dactylopodia. *Proc. Natl. Acad. Sci. USA* **118**. doi:10.1073/pnas.202382911
- Fischer, R. S., Fritz-Six, K. L. and Fowler, V. M. (2003). Pointed-end capping by tropomodulin3 negatively regulates endothelial cell motility. *J. Cell Biol.* **161**, 371-380. doi:10.1083/jcb.200209057
- Fouad Shalaby, J. R., Yamaguchi, T. P., Gertsenstein, M., Wu, X.-F., Breitman, M. L. and Schuh, A. C. (1995). Failure of blood-island formation and vasculogenesis in Flk-1-deficient mice. *Nature* **376**, 62-66. doi:10.1038/376062a0
- Fraccaroli, A., Pitter, B., Taha, A. A., Seebach, J., Huvneers, S., Kirsch, J., Casaroli-Marano, R. P., Zahler, S., Pohl, U., Gerhardt, H. et al. (2015). Endothelial alpha-parvin controls integrity of developing vasculature and is required for maintenance of cell-cell junctions. *Circ. Res.* **117**, 29-40. doi:10.1161/CIRCRESAHA.117.305818
- Fukushima, Y., Okada, M., Kataoka, H., Hirashima, M., Yoshida, Y., Mann, F., Gomi, F., Nishida, K., Nishikawa, S. and Uemura, A. (2011). Sema3E-PlexinD1 signaling selectively suppresses disoriented angiogenesis in ischemic retinopathy in mice. *J. Clin. Invest.* **121**, 1974-1985. doi:10.1172/JCI44900
- Fukushima, Y., Nishiyama, K., Kataoka, H., Fruttiger, M., Fukuhara, S., Nishida, K., Mochizuki, N., Kurihara, H., Nishikawa, S. I. and Uemura, A. (2020). RhoJ integrates attractive and repulsive cues in directional migration of endothelial cells. *EMBO J.* **39**, e102930. doi:10.15252/emboj.2019102930
- Furman, C., Sieminski, A. L., Kwiatkowski, A. V., Rubinson, D. A., Vasile, E., Bronson, R. T., Fassler, R. and Gertler, F. B. (2007). Ena/VASP is required for endothelial barrier function in vivo. *J. Cell Biol.* **179**, 761-775. doi:10.1083/jcb.200705002
- Galvagni, F., Baldari, C. T., Oliviero, S. and Orlandini, M. (2012). An apical actin-rich domain drives the establishment of cell polarity during cell adhesion. *Histochem Cell Biol* **138**, 419-433. doi:10.1007/s00418-012-0965-9
- Garcia-Mata, R., Boulter, E. and Burrige, K. (2011). The 'invisible hand': regulation of RHO GTPases by RHOGDIs. *Nat. Rev. Mol. Cell Biol.* **12**, 493-504. doi:10.1038/nrm3153
- Gavard, J., Patel, V. and Gutkind, J. S. (2008). Angiotensin-1 prevents VEGF-induced endothelial permeability by sequestering Src through mDia. *Dev. Cell* **14**, 25-36. doi:10.1016/j.devcel.2007.10.019
- Gerald, D., Adini, I., Shechter, S., Perruzzi, C., Varnau, J., Hopkins, B., Kazerounian, S., Kurschat, P., Blachon, S., Khedkar, S. et al. (2013). RhoB controls coordination of adult angiogenesis and lymphangiogenesis following injury by regulating VEZF1-mediated transcription. *Nat. Commun.* **4**, 2824. doi:10.1038/ncomms3824
- Gerhardt, H., Golding, M., Fruttiger, M., Ruhrberg, C., Lundkvist, A., Abramsson, A., Jeltsch, M., Mitchell, C., Alitalo, K., Shima, D. et al. (2003). VEGF guides angiogenic sprouting utilizing endothelial tip cell filopodia. *J. Cell Biol.* **161**, 1163-1177. doi:10.1083/jcb.200302047
- Gimona, M., Buccione, R., Courtneidge, S. A. and Linder, S. (2008). Assembly and biological role of podosomes and invadopodia. *Curr. Opin. Cell Biol.* **20**, 235-241. doi:10.1016/j.cob.2008.01.005
- Gladka, M. M., Kohela, A., Molenaar, B., Versteeg, D., Kooijman, L., Monshouwer-Kloots, J., Kremer, V., Vos, H. R., Huibers, M. M. H., Haigh, J. J. et al. (2021). Cardiomyocytes stimulate angiogenesis after ischemic injury in a ZEB2-dependent manner. *Nat. Commun.* **12**, 84. doi:10.1038/s41467-020-20361-3

- Gong, C., Stoletov, K. V. and Terman, B. I. (2004). VEGF treatment induces signaling pathways that regulate both actin polymerization and depolymerization. *Angiogenesis* **7**, 313-321. doi:10.1007/s10456-004-7960-2
- Goyal, P., Behring, A., Kumar, A. and Siess, W. (2011). STK35L1 Associates with nuclear actin and regulates cell cycle and migration of endothelial cells. *PLoS One* **6**, e16249. doi:10.1371/journal.pone.0016249
- Griffiths, G. S., Grundl, M., Allen, J. S., III and Matter, M. L. (2011). R-Ras interacts with filamin a to maintain endothelial barrier function. *J. Cell. Physiol.* **226**, 2287-2296. doi:10.1002/jcp.22565
- Guegan, F., Tatin, F., Leste-Lasserre, T., Drutel, G., Genot, E. and Moreau, V. (2008). p190B RhoGAP regulates endothelial-cell-associated proteolysis through MT1-MMP and MMP2. *J. Cell Sci.* **121**, 2054-2061. doi:10.1242/jcs.025817
- Guo-Hua Fong, J. R., Gertsenstein, M. and Breitman, M. L. (1995). Role of the Flt-1 receptor tyrosine kinase in regulating the assembly of vascular endothelium. *Nature* **376**, 66-70. doi:10.1038/376066a0
- Guo-Hua Fong, L. Z., Bryce, D.-M. and Peng, J. (1999). Increased hemangioblast commitment, not vascular disorganization, is the primary defect in flt-1 knock-out mice. *Development* **126**, 3015-3025. doi:10.1242/dev.126.13.3015
- Gurevich, D. B., David, D. T., Sundaraman, A. and Patel, J. (2021). Endothelial heterogeneity in development and wound healing. *Cells* **10**, 2338. doi:10.3390/cells10092338
- Heasman, S. J. and Ridley, A. J. (2008). Mammalian Rho GTPases: new insights into their functions from in vivo studies. *Nat. Rev. Mol. Cell Biol.* **9**, 690-701. doi:10.1038/nrm2476
- Heemskerk, N., Schimmel, L., Oort, C., Van Rijssel, J., Yin, T., Ma, B., Van Unen, J., Pitter, B., Huveneres, S., Goedhart, J. et al. (2016). F-actin-rich contractile endothelial pores prevent vascular leakage during leukocyte diapedesis through local RhoA signalling. *Nat. Commun.* **7**, 10493. doi:10.1038/ncomms10493
- Hepper, I., Schymeinsky, J., Weckbach, L. T., Jakob, S. M., Frommhold, D., Sixt, M., Laschinger, M., Sperandio, M. and Walzog, B. (2012). The mammalian actin-binding protein 1 is critical for spreading and intraluminal crawling of neutrophils under flow conditions. *J. Immunol.* **188**, 4590-4601. doi:10.4049/jimmunol.1100878
- Hetheridge, C., Scott, A. N., Swain, R. K., Copeland, J. W., Higgs, H. N., Bicknell, R. and Mellor, H. (2012). The formin FMNL3 is a cytoskeletal regulator of angiogenesis. *J. Cell Sci.* **125**:142-1428.
- Horrillo, A., Porras, G., Ayuso, M. S. and Gonzalez-Manchon, C. (2016). Loss of endothelial barrier integrity in mice with conditional ablation of podocalyxin (Podxl) in endothelial cells. *Eur. J. Cell Biol.* **95**, 265-276. doi:10.1016/j.ejcb.2016.04.006
- Hu, Y., Kiely, J. M., Szent, B. E., Rosenzweig, A. and Gimbrone, M. A. Jr. (2000). E-selectin-dependent signaling via the mitogen-activated protein kinase pathway in vascular endothelial cells. *J. Immunol.* **165**, 2142-2148. doi:10.4049/jimmunol.165.4.2142
- Hultin, S., Zheng, Y., Mojallal, M., Vertuani, S., Gentili, C., Balland, M., Milloud, R., Belting, H. G., Affolter, M., Helker, C. S. et al. (2014). AmotL2 links VE-cadherin to contractile actin fibres necessary for aortic lumen expansion. *Nat. Commun.* **5**, 3743. doi:10.1038/ncomms4743
- Huveneres, S., Oldenburg, J., Spanjaard, E., Van Der Krogt, G., Grigoriev, I., Akhmanova, A., Rehmann, H. and De Rooij, J. (2012). Vinculin associates with endothelial VE-cadherin junctions to control force-dependent remodeling. *J. Cell Biol.* **196**, 641-652. doi:10.1083/jcb.201108120
- Kabir, A. U., Subramanian, M., Lee, D. H., Wang, X., Krchma, K., Wu, J., Naismith, T., Halabi, C. M., Kim, J. Y., Pulous, F. E. et al. (2021). Dual role of endothelial Myc1 in tumor angiogenesis and tumor immunity. *Sci Transl Med* **13** eabb6731. doi:10.1126/scitranslmed.abb6731
- Kang, H., Hong, Z., Zhong, M., Klomp, J., Bayless, K. J., Mehta, D., Karginov, A. V., Hu, G. and Malik, A. B. (2019). Piezo1 mediates angiogenesis through activation of MT1-MMP signaling. *Am. J. Physiol. Cell Physiol.* **316**, C92-C103. doi:10.1152/ajpcell.00346.2018
- Katsura, A., Suzuki, H. I., Ueno, T., Mihira, H., Yamazaki, T., Yasuda, T., Watabe, T., Mano, H., Yamada, Y. and Miyazono, K. (2016). MicroRNA-31 is a positive modulator of endothelial-mesenchymal transition and associated secretory phenotype induced by TGF-beta. *Genes Cells* **21**, 99-116. doi:10.1111/gtc.12323
- Kim, C., Yang, H., Fukushima, Y., Saw, P. E., Lee, J., Park, J. S., Park, I., Jung, J., Kataoka, H., Lee, D. et al. (2014). Vascular RhoJ is an effective and selective target for tumor angiogenesis and vascular disruption. *Cancer Cell* **25**, 102-117. doi:10.1016/j.ccr.2013.12.010
- Kim, J., Kim, Y. H., Kim, J., Park, D. Y., Bae, H., Lee, D. H., Kim, K. H., Hong, S. P., Jang, S. P., Kubota, Y. et al. (2017). YAP/TAZ regulates sprouting angiogenesis and vascular barrier maturation. *J. Clin. Invest.* **127**, 3441-3461. doi:10.1172/JCI93825
- Kondrikov, D., Elms, S., Fulton, D. and Su, Y. (2010). eNOS-beta-actin interaction contributes to increased peroxynitrite formation during hyperoxia in pulmonary artery endothelial cells and mouse lungs. *J. Biol. Chem.* **285**, 35479-35487. doi:10.1074/jbc.M110.140269
- Kondrychyn, I., Kelly, D. J., Carretero, N. T., Nomori, A., Kato, K., Chong, J., Nakajima, H., Okuda, S., Mochizuki, N. and Phng, L. K. (2020). Marcks11 modulates endothelial cell mechanoreponse to haemodynamic forces to control blood vessel shape and size. *Nat. Commun.* **11**, 5476. doi:10.1038/s41467-020-19308-5
- Krenning, G., Barauna, V. G., Krieger, J. E., Harmsen, M. C. and Moonen, J. R. (2016). Endothelial plasticity: shifting phenotypes through force feedback. *Stem Cells Int* **2016**, 9762959. doi:10.1155/2016/9762959
- Kugler, E. C., Van Lessen, M., Daetwyler, S., Chhabria, K., Savage, A. M., Silva, V., Plant, K., Macdonald, R. B., Huisken, J., Wilkinson, R. N. et al. (2019). Cerebrovascular endothelial cells form transient Notch-dependent cystic structures in zebrafish. *EMBO Rep.* **20**, e47047-e47047. doi:10.15252/embr.201847047
- Kumar, R., Janjanam, J., Singh, N. K. and Rao, G. N. (2016). A new role for cofilin in retinal neovascularization. *J. Cell Sci.* **129**, 1234-1249.
- Kusuhara, S., Fukushima, Y., Fukuhara, S., Jakt, L. M., Okada, M., Shimizu, Y., Hata, M., Nishida, K., Negi, A., Hirashima, M. et al. (2012). Arhgef15 promotes retinal angiogenesis by mediating VEGF-induced Cdc42 activation and potentiating RhoJ inactivation in endothelial cells. *PLoS One* **7**, e45858. doi:10.1371/journal.pone.0045858
- Kwak, E. A., Pan, C. C., Ramonett, A., Kumar, S., Cruz-Flores, P., Ahmed, T., Ortiz, H. R., Lochhead, J. J., Ellis, N. A., Mouneimne, G. et al. (2022).  $\beta$ (IV)-spectrin as a stalk cell-intrinsic regulator of VEGF signaling. *Nat. Commun.* **13**, 1326. doi:10.1038/s41467-022-28933-1
- Lampugnani, M. G., Orsenigo, F., Rudini, N., Maddaluno, L., Boulday, G., Chapon, F. and Dejana, E. (2010). CCM1 regulates vascular-lumen organization by inducing endothelial polarity. *J. Cell Sci.* **123**, 1073-1080. doi:10.1242/jcs.059329
- Landry, J. and Huot, J. (1999). Regulation of actin dynamics by stress-activated protein kinase 2 (SAPK2)-dependent phosphorylation of heat-shock protein of 27 kDa (Hsp27). *Biochem. Soc. Symp.* **64**, 79-89.
- Leszczynska, K., Kaur, S., Wilson, E., Bicknell, R. and Heath, V. L. (2011). The role of RhoJ in endothelial cell biology and angiogenesis. *Biochem. Soc. Trans.* **39**, 1606-1611. doi:10.1042/BST20110702
- Li, Q., Cao, J., He, Y., Liu, X., Mao, G., Wei, B., Liao, S., Zhang, Q., Li, J., Zheng, L. et al. (2020). R5, a neutralizing antibody to Robo1, suppresses breast cancer growth and metastasis by inhibiting angiogenesis via down-regulating filamin A. *Exp. Cell Res.* **387**, 111756. doi:10.1016/j.yexcr.2019.111756
- Li, X., Bu, X., Lu, B., Avraham, H., Flavell, R. A. and Lim, B. (2002). The hematopoiesis-specific GTP-binding protein RhoH is GTPase deficient and modulates activities of other Rho GTPases by an inhibitory function. *Mol. Cell Biol.* **22**, 1158-1171. doi:10.1128/MCB.22.4.1158-1171.2002
- Li, Y., Uruno, T., Haudenschild, C., Dudek, S. M., Garcia, J. G. and Zhan, X. (2004). Interaction of cortactin and Arp2/3 complex is required for sphingosine-1-phosphate-induced endothelial cell remodeling. *Exp. Cell Res.* **298**, 107-121. doi:10.1016/j.yexcr.2004.03.023
- Li, Z., Huo, X., Chen, K., Yang, F., Tan, W., Zhang, Q., Yu, H., Li, C., Zhou, D., Chen, H. et al. (2022). Profilin 2 and Endothelial Exosomal Profilin 2 Promote Angiogenesis and Myocardial Infarction Repair in Mice. *Front Cardiovasc Med* **9**, 781753. doi:10.3389/fcvm.2022.781753
- Liang, L., Zhao, L., Zan, Y., Zhu, Q., Ren, J. and Zhao, X. (2017). MiR-93-5p enhances growth and angiogenesis capacity of HUVECs by down-regulating EPLIN. *Oncotarget* **8**, 107033-107043. doi:10.18632/oncotarget.22300
- Liebner, S., Cattelino, A., Gallini, R., Rudini, N., Iurlaro, M., Piccolo, S. and Dejana, E. (2004). Beta-catenin is required for endothelial-mesenchymal transformation during heart cushion development in the mouse. *J. Cell Biol.* **166**, 359-367. doi:10.1083/jcb.200403050
- Lin, F., Wang, N. and Zhang, T. C. (2012). The role of endothelial-mesenchymal transition in development and pathological process. *IUBMB Life* **64**, 717-723. doi:10.1002/iub.1059
- Liu, Y., Wada, R., Yamashita, T., Mi, Y., Deng, C. X., Hobson, J. P., Rosenfeldt, H. M., Nava, V. E., Chae, S. S., Lee, M. J. et al. (2000). Edg-1, the G protein-coupled receptor for sphingosine-1-phosphate, is essential for vascular maturation. *J. Clin. Invest.* **106**, 951-961. doi:10.1172/JCI10905
- Liu, Z., Li, W., Ma, X., Ding, N., Spallotta, F., Southon, E., Tessarollo, L., Gaetano, C., Mukoyama, Y. S. and Thiele, C. J. (2014). Essential role of the zinc finger transcription factor Casz1 for mammalian cardiac morphogenesis and development. *J. Biol. Chem.* **289**, 29801-29816. doi:10.1074/jbc.M114.570416
- Liu, L., Chen, J., Sun, L. and Xu, Y. (2018). RhoJ promotes hypoxia induced endothelial-to-mesenchymal transition by activating WDR5 expression. *J. Cell. Biochem.* **119**, 3384-3393. doi:10.1002/jcb.26505
- Lodish, H. (2016). *Molecular cell biology*.
- Lyubimova, A., Bershadsky, A. D. and Ben-Ze'ev, A. (1997). Autoregulation of actin synthesis responds to monomeric actin levels. *J. Cell. Biochem.* **65**, 469-478. doi:10.1002/(SICI)1097-4644(19970615)65:4<469::AID-JCB3>3.0.CO;2-M
- Ma, X., Uchida, Y., Wei, T., Liu, C., Adams, R. H., Kubota, Y., Gutkind, J. S., Mukoyama, Y. S. and Adelstein, R. S. (2020). Nonmuscle myosin 2 regulates cortical stability during sprouting angiogenesis. *Mol. Biol. Cell* **31**, 1974-1987. doi:10.1091/mbc.E20-03-0175
- Machnicka, B., Ponceau, A., Picot, J., Colin, Y. and Lecomte, M. C. (2020). Deficiency of  $\alpha$ II-spectrin affects endothelial cell-matrix contact and migration

- leading to impairment of angiogenesis in vitro. *Cell. Mol. Biol. Lett.* **25**, 3. doi:10.1186/s11658-020-0200-y
- Mackeik, J. L., Brzezinska, P., Burke-Kleinman, J., Craig, A. W., Nicol, C. J. B. and Maurice, D. H.** (2019). A PKA/cdc42 Signaling Axis Restricts Angiogenic Sprouting by Regulating Podosome Rosette Biogenesis and Matrix Remodeling. *Sci. Rep.* **9**, 2385. doi:10.1038/s41598-018-37805-y
- Majumder, S., Zhu, G., Xu, X., Senchanthisai, S., Jiang, D., Liu, H., Xue, C., Wang, X., Coia, H., Cui, Z. et al.** (2016). G-protein-coupled receptor-2-interacting protein-1 controls stalk cell fate by inhibiting delta-like 4-notch 1 signaling. *Cell Rep* **17**, 2532-2541. doi:10.1016/j.celrep.2016.11.017
- Mallavarapu, A. and Mitchison, T.** (1999). Regulated actin cytoskeleton assembly at filopodium tips controls their extension and retraction. *J. Cell Biol.* **146**, 1097-1106. doi:10.1083/jcb.146.5.1097
- Mantilidewi, K. I., Murata, Y., Mori, M., Otsubo, C., Kotani, T., Kusakari, S., Ohnishi, H. and Matozaki, T.** (2014). Shear stress-induced redistribution of vascular endothelial-protein- tyrosine phosphatase (VE-PTP) in endothelial cells and its role in cell elongation. *J. Biol. Chem.* **289**, 6451-6461. doi:10.1074/jbc.M113.529503
- Mantri, M., Scuderi, G. J., Abedini-Nassab, R., Wang, M. F. Z., Mckellar, D., Shi, H., Grodner, B., Butcher, J. T. and De Vlamincq, I.** (2021). Spatiotemporal single-cell RNA sequencing of developing chicken hearts identifies interplay between cellular differentiation and morphogenesis. *Nat. Commun.* **12**, 1771. doi:10.1038/s41467-021-21892-z
- Martinelli, R., Kamei, M., Sage, P. T., Massol, R., Varghese, L., Sciuto, T., Toporsian, M., Dvorak, A. M., Kirchhausen, T., Springer, T. A. et al.** (2013). Release of cellular tension signals self-restorative ventral lamellipodia to heal barrier micro-wounds. *J. Cell Biol.* **201**, 449-465. doi:10.1083/jcb.201209077
- Mcgrath, J. L., Osborn, E. A., Tardy, Y. S., Dewey, C. F., Jr. and Hartwig, J. H.** (2000). Regulation of the actin cycle in vivo by actin filament severing. *Proc. Natl. Acad. Sci. USA* **97**, 6532-6537. doi:10.1073/pnas.100023397
- Mellberg, S., Dimberg, A., Bahram, F., Hayashi, M., Rennel, E., Ameer, A., Westholm, J. O., Larsson, E., Lindahl, P., Cross, M. J. et al.** (2009). Transcriptional profiling reveals a critical role for tyrosine phosphatase VE-PTP in regulation of VEGFR2 activity and endothelial cell morphogenesis. *FASEB J.* **23**, 1490-1502. doi:10.1096/fj.08-123810
- Mellor, H.** (2010). The role of formins in filopodia formation. *Biochim. Biophys. Acta* **1803**, 191-200. doi:10.1016/j.bbamer.2008.12.018
- Miralles, F. and Visa, N.** (2006). Actin in transcription and transcription regulation. *Curr. Opin. Cell Biol.* **18**, 261-266. doi:10.1016/j.ccb.2006.04.009
- Mitra, S. K., Hanson, D. A. and Schlaepfer, D. D.** (2005). Focal adhesion kinase: in command and control of cell motility. *Nat. Rev. Mol. Cell Biol.* **6**, 56-68. doi:10.1038/nrm1549
- Mooren, O. L., Li, J., Nawas, J. and Cooper, J. A.** (2014). Endothelial cells use dynamic actin to facilitate lymphocyte transendothelial migration and maintain the monolayer barrier. *Mol. Biol. Cell* **25**, 4115-4129. doi:10.1091/mbc.e14-05-0976
- Moreau, V., Tatin, F., Varon, C. and Genot, E.** (2003). Actin can reorganize into podosomes in aortic endothelial cells, a process controlled by Cdc42 and RhoA. *Mol. Cell. Biol.* **23**, 6809-6822. doi:10.1128/MCB.23.19.6809-6822.2003
- Mouilleron, S., Wiazlak, M., O'reilly, N., Treisman, R. and McDonald, N. Q.** (2012). Structures of the Phactr1 RPEL domain and RPEL motif complexes with G-actin reveal the molecular basis for actin binding cooperativity. *Structure* **20**, 1960-1970. doi:10.1016/j.str.2012.08.031
- Muller, P. M., Rademacher, J., Bagshaw, R. D., Wortmann, C., Barth, C., Van Unen, J., Alp, K. M., Giudice, G., Eccles, R. L., Heinrich, L. E. et al.** (2020). Systems analysis of RhoGEF and RhoGAP regulatory proteins reveals spatially organized RAC1 signalling from integrin adhesions. *Nat. Cell Biol.* **22**, 498-511. doi:10.1038/s41556-020-0488-x
- Nakajima, H., Yamamoto, K., Agarwala, S., Terai, K., Fukui, H., Fukuhara, S., Ando, K., Miyazaki, T., Yokota, Y., Schmelzer, E. et al.** (2017). Flow-Dependent Endothelial YAP Regulation Contributes to Vessel Maintenance. *Dev. Cell* **40**, 523-536.e6. doi:10.1016/j.devcel.2017.02.019
- Neto, F., Klaus-Bergmann, A., Ong, Y. T., Alt, S., Vion, A. C., Szymborska, A., Carvalho, J. R., Hollfinger, I., Bartels-Klein, E., Franco, C. A. et al.** (2018). YAP and TAZ regulate adherens junction dynamics and endothelial cell distribution during vascular development. *Elife* **7**, e31037. doi:10.7554/eLife.31037
- Nilsson, I., Bahram, F., Li, X., Gualandi, L., Koch, S., Jarvius, M., Soderberg, O., Anisimov, A., Kholova, I., Pytowski, B. et al.** (2010). VEGF receptor 2/3 heterodimers detected in situ by proximity ligation on angiogenic sprouts. *EMBO J.* **29**, 1377-1388. doi:10.1038/emboj.2010.30
- Nohata, N., Uchida, Y., Stratman, A. N., Adams, R. H., Zheng, Y., Weinstein, B. M., Mukouyama, Y. S. and Gutkind, J. S.** (2016). Temporal-specific roles of Rac1 during vascular development and retinal angiogenesis. *Dev. Biol.* **411**, 183-194. doi:10.1016/j.ydbio.2016.02.005
- Norman, L., Sengupta, K. and Aranda-Espinoza, H.** (2011). Blebbing dynamics during endothelial cell spreading. *Eur. J. Cell Biol.* **90**, 37-48. doi:10.1016/j.ejcb.2010.09.013
- Osborn, E. A., Rabodzey, A., Dewey, C. F., Jr and Hartwig, J. H.** (2006). Endothelial actin cytoskeleton remodeling during mechanostimulation with fluid shear stress. *Am. J. Physiol. Cell Physiol.* **290**, C444-C452. doi:10.1152/ajpcell.00218.2005
- Ou, H., Shen, Y. H., Utama, B., Wang, J., Wang, X., Coselli, J. and Wang, X. L.** (2005). Effect of nuclear actin on endothelial nitric oxide synthase expression. *Arterioscler. Thromb. Vasc. Biol.* **25**, 2509-2514. doi:10.1161/01.ATV.0000189306.99112.4c
- Özdemir, A., Bişoğlu, B., Şimay, Y. D., Polat, B. and Ark, M.** (2015). Ouabain induces Rho-dependent rock activation and membrane blebbing in cultured endothelial cells. *Molecular Biology* **49**, 138-143. doi:10.1134/S0026893315010136
- Paatero, L., Sauter, L., Lee, M., Lagendijk, A. K., Heutschi, D., Wiesner, C., Guzmán, C., Bieli, D., Hogan, B. M., Affolter, M. et al.** (2018). Junction-based lamellipodia drive endothelial cell rearrangements in vivo via a VE-cadherin-F-actin based oscillatory cell-cell interaction. *Nat. Commun.* **9**, 3545. doi:10.1038/s41467-018-05851-9
- Paik, D. T., Tian, L., Williams, I. M., Rhee, S., Zhang, H., Liu, C., Mishra, R., Wu, S. M., Red-Horse, K. and Wu, J. C.** (2020). Single-Cell RNA Sequencing Unveils Unique Transcriptomic Signatures of Organ-Specific Endothelial Cells. *Circulation* **142**, 1848-1862. doi:10.1161/CIRCULATIONAHA.119.041433
- Pang, J., Hoefen, R., Pryhuber, G. S., Wang, J., Yin, G., White, R. J., Xu, X., O'dell, M. R., Mohan, A., Michalowski, H. et al.** (2009). G-protein-coupled receptor kinase interacting protein-1 is required for pulmonary vascular development. *Circulation* **119**, 1524-1532. doi:10.1161/CIRCULATIONAHA.108.823997
- Paris, N., Krasinska, L., Harker, B., Urbach, S., Rossignol, M., Camasses, A., Dewar, J., Morin, N. and Fisher, D.** (2017). Initiation of DNA replication requires actin dynamics and formin activity. *EMBO J.* **36**, 3212-3231. doi:10.15252/embj.201796585
- Paul, A. and Pollard, T.** (2008). The role of the FH1 domain and profilin in formin-mediated actin-filament elongation and nucleation. *Curr. Biol.* **18**, 9-19. doi:10.1016/j.cub.2007.11.062
- Petrovic, N., Schacke, W., Gahagan, J. R., O'conor, C. A., Winnicka, B., Conway, R. E., Mina-Osorio, P. and Shapiro, L. H.** (2007). CD13/APN regulates endothelial invasion and filopodia formation. *Blood* **110**, 142-150. doi:10.1182/blood-2006-02-002931
- Phng, L.-K., Potente, M., Leslie, J. D., Babbage, J., Nyqvist, D., Lobov, I., Ondr, J. K., Rao, S., Lang, R. A., Thurston, G. et al.** (2009). Nrarp Coordinates Endothelial Notch and Wnt Signaling to Control Vessel Density in Angiogenesis. *Dev. Cell* **16**, 70-82. doi:10.1016/j.devcel.2008.12.009
- Phng, L. K., Gebala, V., Bentley, K., Philippides, A., Wacker, A., Mathivet, T., Sauter, L., Stanchi, F., Belting, H. G., Affolter, M. et al.** (2015). Formin-mediated actin polymerization at endothelial junctions is required for vessel lumen formation and stabilization. *Dev. Cell* **32**, 123-132. doi:10.1016/j.devcel.2014.11.017
- Phng, L. K., Stanchi, F. and Gerhardt, H.** (2013). Filopodia are dispensable for endothelial tip cell guidance. *Development* **140**, 4031-4040. doi:10.1242/dev.097352
- Piera-Velazquez, S. and Jimenez, S. A.** (2019). Endothelial to mesenchymal transition: role in physiology and in the pathogenesis of human diseases. *Physiol. Rev.* **99**, 1281-1324. doi:10.1152/physrev.00021.2018
- Pieterse, E., Rother, N., Garsen, M., Hofstra, J. M., Satchell, S. C., Hoffmann, M., Loeven, M. A., Knaapen, H. K., Van Der Heijden, O. W. H., Berden, J. H. M. et al.** (2017). Neutrophil Extracellular Traps Drive Endothelial-to-Mesenchymal Transition. *Arterioscler. Thromb. Vasc. Biol.* **37**, 1371-1379. doi:10.1161/ATVBAHA.117.309002
- Ranade, S. S., Qiu, Z., Woo, S. H., Hur, S. S., Murthy, S. E., Cahalan, S. M., Xu, J., Mathur, J., Bandell, M., Coste, B. et al.** (2014). Piezo1, a mechanically activated ion channel, is required for vascular development in mice. *Proc. Natl. Acad. Sci. USA* **111**, 10347-10352. doi:10.1073/pnas.1409233111
- Rengarajan, M., Hayer, A. and Theriot, J. A.** (2016). Endothelial cells use a formin-dependent phagocytosis-like process to internalize the bacterium *Listeria monocytogenes*. *PLoS Pathog.* **12**, e1005603. doi:10.1371/journal.ppat.1005603
- Richards, M., Hetheridge, C. and Mellor, H.** (2015). The formin FMNL3 controls early apical specification in endothelial cells by regulating the polarized trafficking of podocalyxin. *Curr. Biol.* **25**, 2325-2331. doi:10.1016/j.cub.2015.07.045
- Rossddeutsch, A., Smart, N., Dube, K. N., Turner, M. and Riley, P. R.** (2012). Essential role for thymosin beta4 in regulating vascular smooth muscle cell development and vessel wall stability. *Circ. Res.* **111**, e89-e102. doi:10.1161/CIRCRESAHA.111.259846
- Rothschild, P.-R., Salah, S., Berdugo, M., Gélizé, E., Delaunay, K., Naud, M.-C., Klein, C., Moulin, A., Savoldelli, M., Bergin, C. et al.** (2017). ROCK-1 mediates diabetes-induced retinal pigment epithelial and endothelial cell blebbing: Contribution to diabetic retinopathy. *Sci. Rep.* **7**, 8834. doi:10.1038/s41598-017-07329-y
- Rottiers, P., Saltel, F., Daubon, T., Chaigne-Delalande, B., Tridon, V., Billotet, C., Reuzeau, E. and Genot, E.** (2009). TGFbeta-induced endothelial podosomes mediate basement membrane collagen degradation in arterial vessels. *J. Cell Sci.* **122**, 4311-4318. doi:10.1242/jcs.057448
- Sanders, A. J., Ye, L., Mason, M. D. and Jiang, W. G.** (2010). The impact of EPLINα (Epithelial protein lost in neoplasm) on endothelial cells, angiogenesis and tumorigenesis. *Angiogenesis* **13**, 317-326. doi:10.1007/s10456-010-9188-7

- Schaefer, A., Te Riet, J., Ritz, K., Hoogenboezem, M., Anthony, E. C., Mul, F. P., De Vries, C. J., Daemen, M. J., Figgdor, C. G., Van Buul, J. D. et al. (2014). Actin-binding proteins differentially regulate endothelial cell stiffness, ICAM-1 function and neutrophil transmigration. *J. Cell Sci.* **127**, 4470-4482. doi:10.1242/jcs.164814
- Schmidt, M., Paes, K., De Maziere, A., Smyczek, T., Yang, S., Gray, A., French, D., Kasman, I., Klumperman, J., Rice, D. S. et al. (2007). EGFL7 regulates the collective migration of endothelial cells by restricting their spatial distribution. *Development* **134**, 2913-2923. doi:10.1242/dev.002576
- Schonichen, A. and Geyer, M. (2010). Fifteen formins for an actin filament: a molecular view on the regulation of human formins. *Biochim. Biophys. Acta* **1803**, 152-163. doi:10.1016/j.bbamcr.2010.01.014
- Seano, G., Chiaverina, G., Gagliardi, P. A., Di Blasio, L., Puliafito, A., Bouvard, C., Sessa, R., Tarone, G., Sorokin, L., Helley, D. et al. (2014a). Endothelial podosome rosettes regulate vascular branching in tumour angiogenesis. *Nat Cell Biol* **16** 931-41, 1-8.
- Seano, G., Daubon, T., Genot, E. and Primo, L. (2014b). Podosomes as novel players in endothelial biology. *Eur. J. Cell Biol.* **93**, 405-412. doi:10.1016/j.ejcb.2014.07.009
- Searles, C. D., Ide, L., Davis, M. E., Cai, H. and Weber, M. (2004). Actin cytoskeleton organization and posttranscriptional regulation of endothelial nitric oxide synthase during cell growth. *Circ. Res.* **95**, 488-495. doi:10.1161/01.RES.0000138953.21377.80
- Seebach, J., Klusmeier, N. and Schnittler, H. (2020). Autoregulatory "Multitasking" at Endothelial Cell Junctions by Junction-Associated Intermittent Lamellipodia Controls Barrier Properties. *Front Physiol* **11**, 586921. doi:10.3389/fphys.2020.586921
- Sheldon, H., Andre, M., Legg, J. A., Heal, P., Herbert, J. M., Sainson, R., Sharma, A. S., Kitajewski, J. K., Heath, V. L. and Bicknell, R. (2009). Active involvement of Robo1 and Robo4 in filopodia formation and endothelial cell motility mediated via WASP and other actin nucleation-promoting factors. *FASEB J.* **23**, 513-522. doi:10.1096/fj.07-098269
- Shen, T. L., Park, A. Y., Alcaraz, A., Peng, X., Jang, I., Koni, P., Flavell, R. A., Gu, H. and Guan, J. L. (2005). Conditional knockout of focal adhesion kinase in endothelial cells reveals its role in angiogenesis and vascular development in late embryogenesis. *J. Cell Biol.* **169**, 941-952. doi:10.1083/jcb.200411155
- Shi, T. T., Li, G. and Xiao, H. T. (2016). The role of RhoJ in endothelial cell biology and tumor pathology. *Biomed Res Int* **2016**, 6386412.
- Shimizu, Y., Thumkeo, D., Keel, J., Ishizaki, T., Oshima, H., Oshima, M., Noda, Y., Matsumoto, F., Taketo, M. M. and Narumiya, S. (2005). ROCK-1 regulates closure of the eyelids and ventral body wall by inducing assembly of actomyosin bundles. *J. Cell Biol.* **168**, 941-953. doi:10.1083/jcb.200411179
- Shmerling, D., Danzer, C. P., Mao, X., Boisclair, J., Haffner, M., Lemaistre, M., Schuler, V., Kaeslin, E., Korn, R., Burki, K. et al. (2005). Strong and ubiquitous expression of transgenes targeted into the beta-actin locus by Cre/lox cassette replacement. *Genesis* **42**, 229-235. doi:10.1002/gene.20135
- Slee, J. B. and Lowe-Krentz, L. J. (2013). Actin realignment and cofilin regulation are essential for barrier integrity during shear stress. *J. Cell. Biochem.* **114**, 782-795. doi:10.1002/jcb.24416
- Souihol, C., Harmsen, M. C., Evans, P. C. and Krenning, G. (2018). Endothelial-mesenchymal transition in atherosclerosis. *Cardiovasc. Res.* **114**, 565-577. doi:10.1093/cvr/cvx253
- Spring, K., Chabot, C., Langlois, S., Lapointe, L., Trinh, N. T., Caron, C., Hebda, J. K., Gavard, J., Elchebly, M. and Roy, I. (2012). Tyrosine phosphorylation of DEP-1/CD148 as a mechanism controlling Src kinase activation, endothelial cell permeability, invasion, and capillary formation. *Blood* **120**, 2745-2756. doi:10.1182/blood-2011-12-398040
- Spuul, P., Daubon, T., Pitter, B., Alonso, F., Fremaux, I., Kramer, I., Montanez, E. and Genot, E. (2016). VEGF-A/notch-induced podosomes proteolyse basement membrane collagen-IV during retinal sprouting angiogenesis. *Cell Rep* **17**, 484-500. doi:10.1016/j.celrep.2016.09.016
- Strilić, B., Kučera, T., Eglinger, J., Hughes, M. R., McNagny, K. M., Tsukita, S., Dejana, E., Ferrara, N. and Lammert, E. (2009). The molecular basis of vascular lumen formation in the developing mouse aorta. *Dev. Cell* **17**, 505-515. doi:10.1016/j.devcel.2009.08.011
- Sullivan, D. P. and Muller, W. A. (2014). Neutrophil and monocyte recruitment by PECAM, CD99, and other molecules via the LBRC. *Semin. Immunopathol.* **36**, 193-209. doi:10.1007/s00281-013-0412-6
- Sundararaman, A. and Mellor, H. (2020). A functional antagonism between RhoJ and Cdc42 regulates fibronectin remodelling during angiogenesis. *Small GTPases* **12**, 241-245. doi:10.1080/21541248.2020.1809927
- Sundararaman, A., Fukushima, Y., Norman, J. C., Uemura, A. and Mellor, H. (2020). RhoJ regulates alpha5beta1 integrin trafficking to control fibronectin remodeling during angiogenesis. *Curr. Biol.* **30**, 2146-2155.e5. doi:10.1016/j.cub.2020.03.042
- Suzuki, H. I., Katsura, A., Mihira, H., Horie, M., Saito, A. and Miyazono, K. (2017). Regulation of TGF-beta-mediated endothelial-mesenchymal transition by microRNA-27. *J. Biochem.* **161**, 417-420. doi:10.1093/jb/mvx017
- Tagashira, T., Fukuda, T., Miyata, M., Nakamura, K., Fujita, H., Takai, Y., Hirata, K. I. and Rikitake, Y. (2018). Afadin facilitates vascular endothelial growth factor-induced network formation and migration of vascular endothelial cells by inactivating rho-associated kinase through ArhGAP29. *Arterioscler. Thromb. Vasc. Biol.* **38**, 1159-1169. doi:10.1161/ATVBAHA.118.310991
- Taha, M., Aldirawi, M., Marz, S., Seebach, J., Odenthal-Schnittler, M., Bondareva, O., Bojovic, V., Schmandra, T., Wirth, B., Mietkowska, M. et al. (2019). EPLIN-alpha and -beta isoforms modulate endothelial cell dynamics through a spatiotemporally differentiated interaction with actin. *Cell Rep* **29**, 1010-1026.e6. doi:10.1016/j.celrep.2019.09.043
- Tajadura-Ortega, V., Garg, R., Allen, R., Owczarek, C., Bright, M. D., Kean, S., Mohd-Noor, A., Grigoriadis, A., Elston, T. C., Hahn, K. M. et al. (2018). An RNAi screen of Rho signalling networks identifies RhoH as a regulator of Rac1 in prostate cancer cell migration. *BMC Biol.* **16**, 29. doi:10.1186/s12915-018-0489-4
- Takase, H., Matsumoto, K., Yamadera, R., Kubota, Y., Otsu, A., Suzuki, R., Ishitobi, H., Mochizuki, H., Kojima, T., Takano, S. et al. (2012). Genome-wide identification of endothelial cell-enriched genes in the mouse embryo. *Blood* **120**, 914-923. doi:10.1182/blood-2011-12-398156
- Takeya, R., Taniguchi, K., Narumiya, S. and Sumimoto, H. (2008). The mammalian formin FHOD1 is activated through phosphorylation by ROCK and mediates thrombin-induced stress fibre formation in endothelial cells. *EMBO J.* **27**, 618-628. doi:10.1038/emboj.2008.7
- Thumkeo, D., Keel, J., Ishizaki, T., Hirose, M., Nonomura, K., Oshima, H., Oshima, M., Taketo, M. M. and Narumiya, S. (2003). Targeted disruption of the mouse rho-associated kinase 2 gene results in intrauterine growth retardation and fetal death. *Mol. Cell. Biol.* **23**, 5043-5055. doi:10.1128/MCB.23.14.5043-5055.2003
- Valisno, J. A. C., May, J., Singh, K., Helm, E. Y., Venegas, L., Budbazar, E., Goodman, J. B., Nicholson, C. J., Avram, D., Cohen, R. A. et al. (2021). BCL11B regulates arterial stiffness and related target organ damage. *Circ. Res.* **128**, 755-768. doi:10.1161/CIRCRESAHA.120.316666
- Van Buul, J. D., Van Rijssel, J., Van Alphen, F. P., Hoogenboezem, M., Tol, S., Hoeben, K. A., Van Marle, J., Mul, E. P. and Hordijk, P. L. (2010). Inside-out regulation of ICAM-1 dynamics in TNF-alpha-activated endothelium. *PLoS One* **5**, e11336. doi:10.1371/journal.pone.0011336
- Van Geemen, D., Smeets, M. W., Van Stalborch, A. M., Woerdeman, L. A., Daemen, M. J., Hordijk, P. L. and Huvencers, S. (2014). F-actin-anchored focal adhesions distinguish endothelial phenotypes of human arteries and veins. *Arterioscler. Thromb. Vasc. Biol.* **34**, 2059-2067. doi:10.1161/ATVBAHA.114.304180
- Van Gorp, R. M., Broers, J. L., Reutelingsperger, C. P., Bronnenberg, N. M., Hornstra, G., Van Dam-Mieras, M. C. and Heemskerk, J. W. (1999). Peroxide-induced membrane blebbing in endothelial cells associated with glutathione oxidation but not apoptosis. *Am. J. Physiol.* **277**, C20-C28. doi:10.1152/ajpcell.1999.277.1.C20
- Varon, C., Tatin, F., Moreau, V., Van Obberghen-Schilling, E., Fernandez-Sauze, S., Reuzeau, E., Kramer, I. and Genot, E. (2006). Transforming growth factor beta induces rosettes of podosomes in primary aortic endothelial cells. *Mol. Cell. Biol.* **26**, 3582-3594. doi:10.1128/MCB.26.9.3582-3594.2006
- Vestweber, D. (2012). Relevance of endothelial junctions in leukocyte extravasation and vascular permeability. *Ann. N. Y. Acad. Sci.* **1257**, 184-192. doi:10.1111/j.1749-6632.2012.06558.x
- Wakayama, Y., Fukuhara, S., Ando, K., Matsuda, M. and Mochizuki, N. (2015). Cdc42 mediates Bmp-induced sprouting angiogenesis through Fmn13-driven assembly of endothelial filopodia in zebrafish. *Dev. Cell* **32**, 109-122. doi:10.1016/j.devcel.2014.11.024
- Wang, H., Ramshekar, A., Kunz, E., Sacks, D. B. and Hartnett, M. E. (2020). IQGAP1 causes choroidal neovascularization by sustaining VEGFR2-mediated Rac1 activation. *Angiogenesis* **23**, 685-698. doi:10.1007/s10456-020-09740-y
- Wang, J., Jiang, J., Yang, X., Zhou, G., Wang, L. and Xiao, B. (2022). Tethering Piezo channels to the actin cytoskeleton for mechanogating via the cadherin-beta-catenin mechanotransduction complex. *Cell Rep.* **38**, 110342. doi:10.1016/j.celrep.2022.110342
- Wang, J., Taba, Y., Pang, J., Yin, G., Yan, C. and Berk, B. C. (2009). GIT1 mediates VEGF-induced podosome formation in endothelial cells: critical role for PLCgamma. *Arterioscler. Thromb. Vasc. Biol.* **29**, 202-208. doi:10.1161/ATVBAHA.108.174391
- Wang, L. J., Xiao, F., Kong, L. M., Wang, D. N., Li, H. Y., Wei, Y. G., Tan, C., Zhao, H., Zhang, T., Cao, G. Q. et al. (2018). Intermedin enlarges the vascular lumen by inducing the quiescent endothelial cell proliferation. *Arterioscler. Thromb. Vasc. Biol.* **38**, 398-413. doi:10.1161/ATVBAHA.117.310317
- Wang, X., Freire Valls, A., Schermann, G., Shen, Y., Moya, I. M., Castro, L., Urban, S., Solecki, G. M., Winkler, F., Riedemann, L. et al. (2017). YAP/TAZ Orchestrate VEGF Signaling during Developmental Angiogenesis. *Dev. Cell* **42**, 462-478.e7. doi:10.1016/j.devcel.2017.08.002
- Watanabe, N., Madaule, P., Reid, T., Ishizaki, T., Watanabe, G., Kakizuka, A., Saito, Y., Nakao, K., Jockusch, B. M. and Narumiya, S. (1997). p140mDia, a mammalian homolog of Drosophila diaphanous, is a target protein for Rho small GTPase and is a ligand for profilin. *EMBO J.* **16**, 3044-3056. doi:10.1093/emboj/16.11.3044

- Wennerberg, K., Forget, M. A., Ellerbroek, S. M., Arthur, W. T., Burrridge, K., Settleman, J., Der, C. J. and Hansen, S. H. (2003). Rnd proteins function as RhoA antagonists by activating p190 RhoGAP. *Curr. Biol.* **13**, 1106-1115. doi:10.1016/S0960-9822(03)00418-4
- Werner, A. C., Weckbach, L. T., Salvermoser, M., Pitter, B., Cao, J., Maier-Begandt, D., Forne, I., Schnittler, H. J., Walzog, B. and Montanez, E. (2020). Coronin 1B Controls Endothelial Actin Dynamics at Cell-Cell Junctions and Is Required for Endothelial Network Assembly. *Front Cell Dev Biol* **8**, 708. doi:10.3389/fcell.2020.00708
- Wheeler, A. P. and Ridley, A. J. (2004). Why three Rho proteins? RhoA, RhoB, RhoC, and cell motility. *Exp. Cell Res.* **301**, 43-49. doi:10.1016/j.yexcr.2004.08.012
- Whelan, M. C. and Senger, D. R. (2003). Collagen I initiates endothelial cell morphogenesis by inducing actin polymerization through suppression of cyclic AMP and protein kinase A. *J. Biol. Chem.* **278**, 327-334. doi:10.1074/jbc.M207554200
- Wilson, E., Leszczynska, K., Poulter, N. S., Edelmann, F., Salisbury, V. A., Noy, P. J., Bacon, A., Rappoport, J. Z., Heath, J. K., Bicknell, R. et al. (2014). RhoJ interacts with the GIT-PIX complex and regulates focal adhesion disassembly. *J. Cell Sci.* **127**, 3039-3051.
- Wunderlich, M., Keller, L., Cagna, G., Broermann, A., Kamenyeva, O., Kiefer, F., Deutsch, U., Nottebaum, A. F. and Vestweber, D. (2009). VE-PTP controls blood vessel development by balancing Tie-2 activity. *J. Cell Biol.* **185**, 657-671. doi:10.1083/jcb.200811159
- Witke, W., Sutherland, J. D., Sharpe, A., Arai, M. and Kwiatkowski, D. J. (2001). Profilin I is essential for cell survival and cell division in early mouse development. *Proc. Natl. Acad. Sci. USA* **98**, 3832-3836. doi:10.1073/pnas.051515498
- Xu, K., Sacharidou, A., Fu, S., Chong, D. C., Skaug, B., Chen, Z. J., Davis, G. E. and Cleaver, O. (2011). Blood Vessel Tubulogenesis Requires Rasip1 Regulation of GTPase Signaling. *Dev. Cell* **20**, 526-539. doi:10.1016/j.devcel.2011.02.010
- Yamada, S. and Nelson, W. J. (2007). Localized zones of Rho and Rac activities drive initiation and expansion of epithelial cell-cell adhesion. *J. Cell Biol.* **178**, 517-527. doi:10.1083/jcb.200701058
- Yamazaki, D., Suetsugu, S., Miki, H., Kataokak, Y., Nishikawa, S.-I., Fujiwara, T., Yoshidak, N. and Takenawa, T. (2003). WAVE2 is required for directed cell migration and cardiovascular development. *Nature* **424**, 452-456. doi:10.1038/nature01770
- Yang, L., Kowalski, J. R., Yacono, P., Bajmoczy, M., Shaw, S. K., Froio, R. M., Golan, D. E., Thomas, S. M. and Lusinskas, F. W. (2006). Endothelial cell cortactin coordinates intercellular adhesion molecule-1 clustering and actin cytoskeleton remodeling during polymorphonuclear leukocyte adhesion and transmigration. *J. Immunol.* **177**, 6440-6449. doi:10.4049/jimmunol.177.9.6440
- Yao, H., Shi, W., Wu, J., Xu, C., Wang, J., Shao, Y., Wu, X. and Zhang, Z. (2015). Endothelial Rac1 is essential for hematogenous metastasis to the lung. *Oncotarget* **6**, 17501-17513. doi:10.18632/oncotarget.3766
- You, X., Sun, W., Wang, Y., Liu, X., Wang, A., Liu, L., Han, S., Sun, Y., Zhang, J., Guo, L. et al. (2021). Cervical cancer-derived exosomal miR-663b promotes angiogenesis by inhibiting vinculin expression in vascular endothelial cells. *Cancer Cell Int* **21**, 684. doi:10.1186/s12935-021-02379-9
- Zahra, F. T., Sajib, M. S., Ichiyama, Y., Akwii, R. G., Tullar, P. E., Cobos, C., Minchew, S. A., Doci, C. L., Zheng, Y., Kubota, Y. et al. (2019). Endothelial RhoA GTPase is essential for in vitro endothelial functions but dispensable for physiological in vivo angiogenesis. *Sci. Rep.* **9**, 11666. doi:10.1038/s41598-019-48053-z
- Zeng, Y. F., Xiao, Y. S., Liu, Y., Luo, X. J., Wen, L. D., Liu, Q. and Chen, M. (2018). Formin-like 3 regulates RhoC/FAK pathway and actin assembly to promote cell invasion in colorectal carcinoma. *World J. Gastroenterol.* **24**, 3884-3897. doi:10.3748/wjg.v24.i34.3884
- Zhang, Y., Zhang, Y., Kameishi, S., Barutello, G., Zheng, Y., Tobin, N. P., Nicosia, J., Hennig, K., Chiu, D. K.-C., Balland, M. et al. (2021). The Amot/Integrin protein complex transmits mechanical forces required for vascular expansion. *Cell Rep.* **36**, 109616. doi:10.1016/j.celrep.2021.109616
- Zhao, B., Li, L., Lu, Q., Wang, L. H., Liu, C. Y., Lei, Q. and Guan, K. L. (2011). Angiomotin is a novel Hippo pathway component that inhibits YAP oncoprotein. *Genes Dev.* **25**, 51-63. doi:10.1101/gad.2000111
- Zink, J., Frye, M., Frömel, T., Carlantoni, C., John, D., Schreier, D., Weigert, A., Laban, H., Salinas, G., Stingl, H. et al. (2021). EVL regulates VEGF receptor-2 internalization and signaling in developmental angiogenesis. *EMBO Rep.* **22**, e48961. doi:10.15252/embr.201948961
- Zovein, A. C., Luque, A., Turlo, K. A., Hofmann, J. J., Yee, K. M., Becker, M. S., Fassler, R., Mellman, I., Lane, T. F. and Iruela-Arispe, M. L. (2010).  $\beta$ 1 integrin establishes endothelial cell polarity and arteriolar lumen formation via a Par3-dependent mechanism. *Dev. Cell* **18**, 39-51. doi:10.1016/j.devcel.2009.12.006
